# Supplementary material
Source: PubMed Central journal article supplement (PMC4387548)
Supplement: NIHMS642981-supplement-2.pdf [file NIHMS642981-supplement-2.pdf]

Supporting Information for the *International Journal of Mass Spectrometry*:

## Protein Expression by Human Pulmonary Artery Smooth Muscle Cells Containing a *BMP2* Mutation and the Action of ET-1 as Determined by Proteomic Mass Spectrometry

Chunxiang Yao,<sup>a,#</sup> Jun Yu,<sup>b,#</sup> Linda Taylor,<sup>b</sup> Peter Polgar,<sup>b</sup> Mark E. McComb,<sup>a</sup>  
Catherine E. Costello<sup>a,b\*</sup>

<sup>a</sup>Center for Biomedical Mass Spectrometry, 670 Albany St, 5<sup>th</sup> fl., Boston University School of Medicine, Boston, MA 02118 USA

<sup>b</sup>Department of Biochemistry, Boston University School of Medicine, Boston, MA 02118 USA

<sup>#</sup>These authors made equal contributions; \* Corresponding author.

- Page 2**      **Supplementary Figure 1A.** The cultured human pulmonary smooth muscle cells were stained with antibodies against smooth muscle  $\alpha$ -actin.
- Page 3**      **Supplementary Figure 1B.** The whole image of the Western blot after Ponceau S staining.
- Page 4**      **Supplementary Figure 2.** Differentially expressed proteins related to protein synthesis.
- Page 8**      **Supplementary Figure 3.** Differentially expressed proteins related with RhoA signaling, cytoskeleton organization and muscle contraction. The diagrams in 3A, 3B, and 3C present illustrations of the three comparisons.
- Page 12**     **Supplementary Table 1 (Separate Excel file).** Differentially expressed proteins in Control and PAH PASM cells, in the absence and presence of ET-1.
- Page 12**     **Supplementary Table 2.** Detailed description of protein expression changes in described canonical pathways
- Page 50**     **Supplementary Table 3.** Meta data for Figure 5 and Supplementary Figure 2.
- Page 53**     **Supplementary Table 4.** Meta data for Figure 6 and Supplementary Figure 3.
- Page 56**     **Supplementary Table 5.** (a) CV% (or % RSD) based on summed intensity of respective proteins (b) T-test calculations indicated the significance of changes from replicate analyses in group comparison.

**Supplementary Figure 1A.** The cultured human pulmonary smooth muscle cells were stained with antibodies against smooth muscle  $\alpha$ -actin.

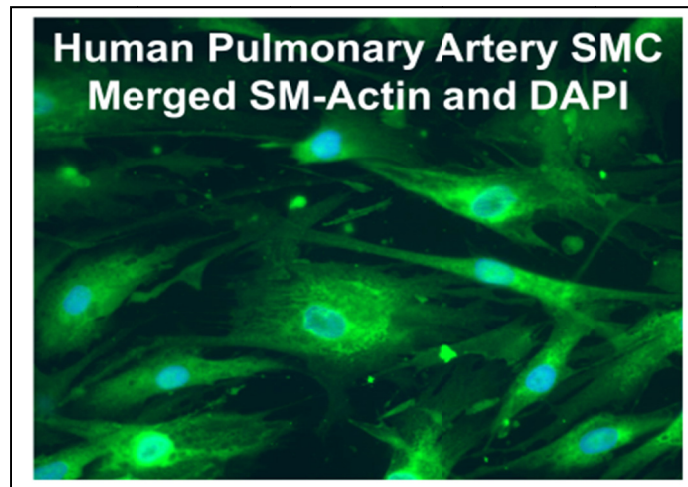

**Supplementary Figure 1B.** The whole image of the Western blot after Ponceau S staining. After the transfer, the blot was stained for proteins using Ponceau S for 5 min, then, destained in 1% acetic acid until background is reduced. The stained blot was scanned for a permanent record. The blot was then rinsed with TBS-Tween to remove Ponceau S.

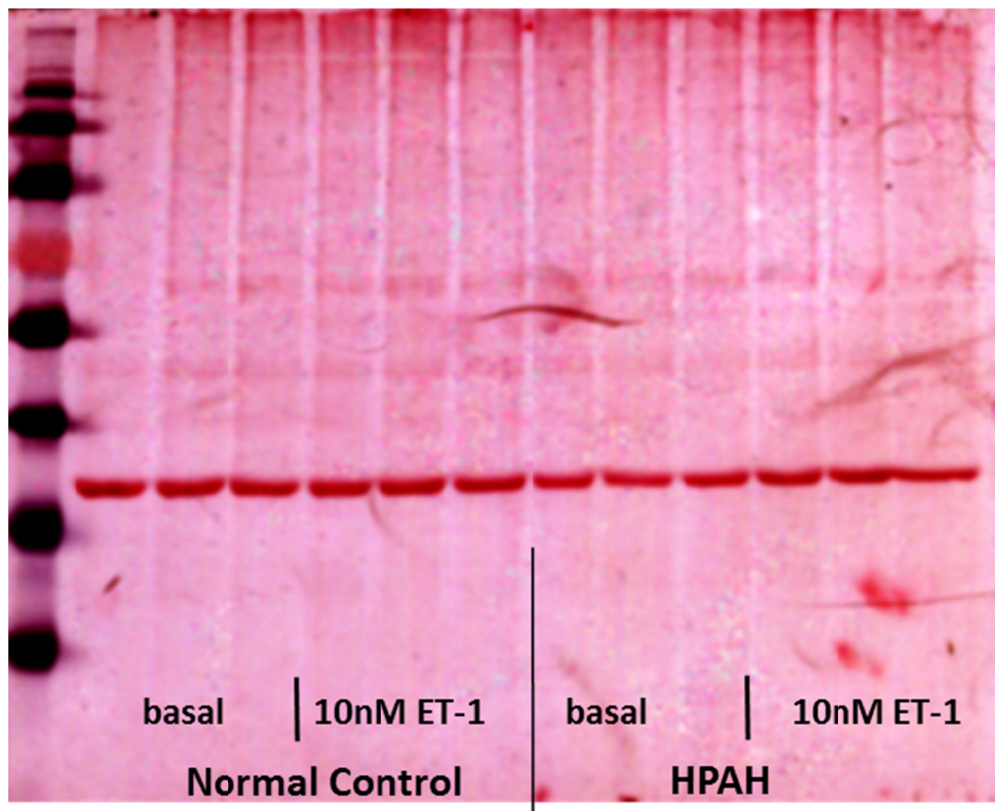

**Supplementary Figure 2.** Differentially expressed proteins related to protein synthesis. A, B, and C illustrate the diagram of the three comparisons. A. ET-1 treated *vs.* basal in PAH PASMC; B. PAH cells *vs.* Control cells under basal conditions; C. PAH *vs.* Control cells, both with ET-1 stimulation. The nodes represent different proteins. Green indicates downregulation, red indicates upregulation, and color intensity is proportional to fold change. The full name and fold changes of these proteins can be found in Supplementary Table 3. The annotations are supported by at least one reference from the literature, a textbook, or canonical information stored in the Ingenuity knowledge base.



**2B.** Protein expression changes found in PAH compared with CONTROL without ET-1 stimulation.

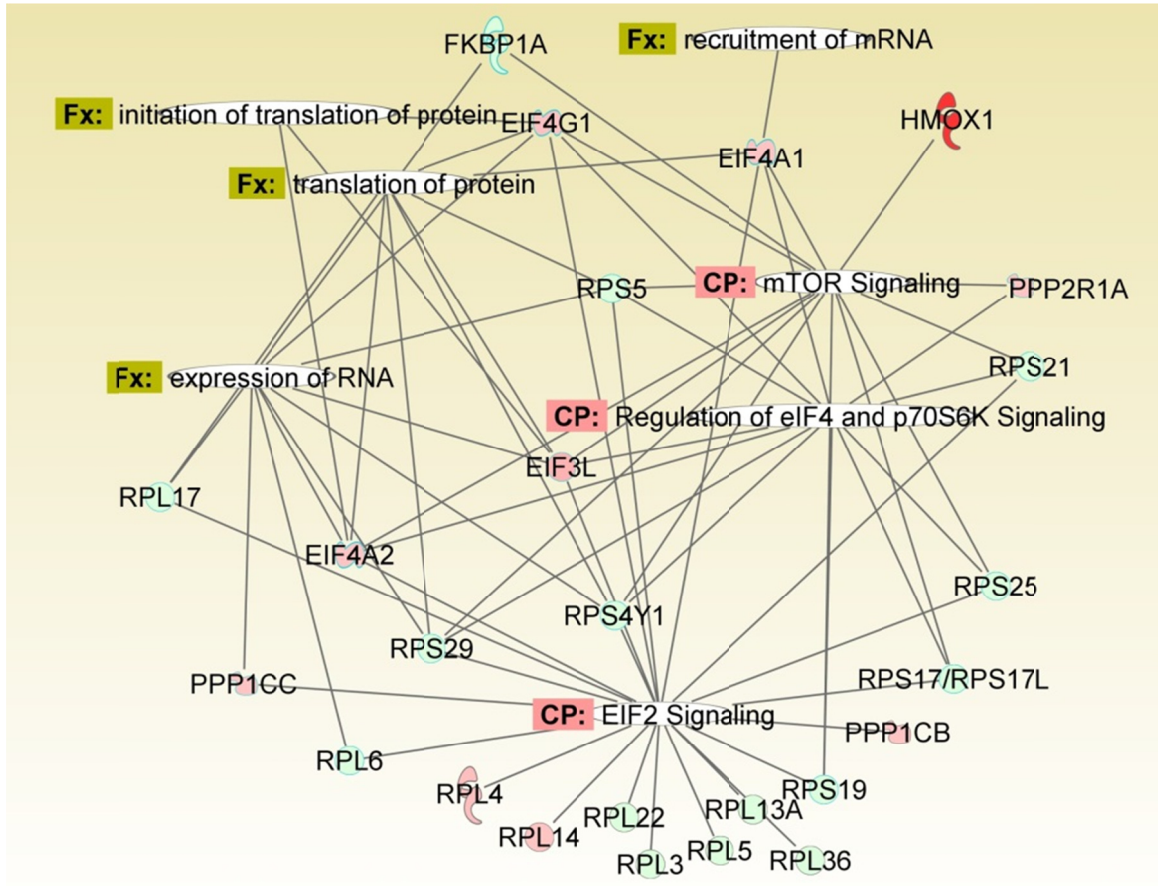

2C. Protein expression changes found in PAH compared with CONTROL both with ET-1 stimulation.

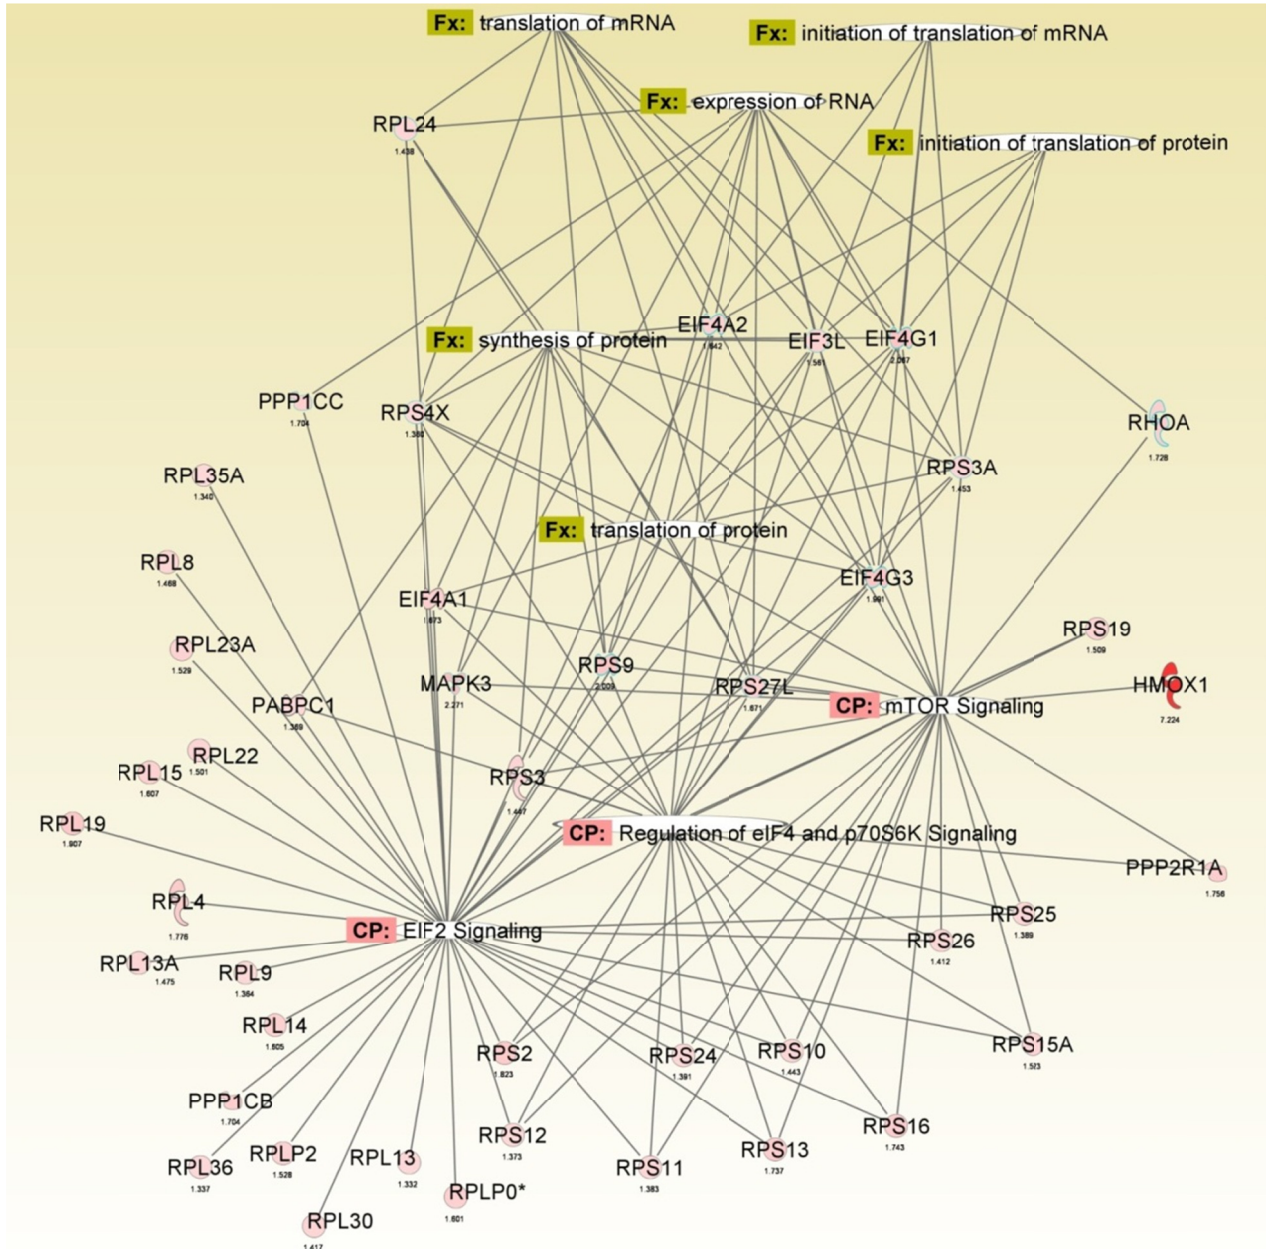

**Supplementary Figure 3.** Differentially expressed proteins related with RhoA signaling, cytoskeleton organization and muscle contraction. A, B, and C illustrate the diagram of the three comparisons. A. ET-1 treated *vs.* basal in PAH PASM; B. PAH cells *vs.* Control cells under basal conditions; C. PAH *vs.* Control cells, both with ET-1 stimulation. The full name and fold changes of these proteins can be found in Supplementary Table 4.







3C. Protein expression changes found in PAH compared with CONTROL both with ET-1 stimulation.

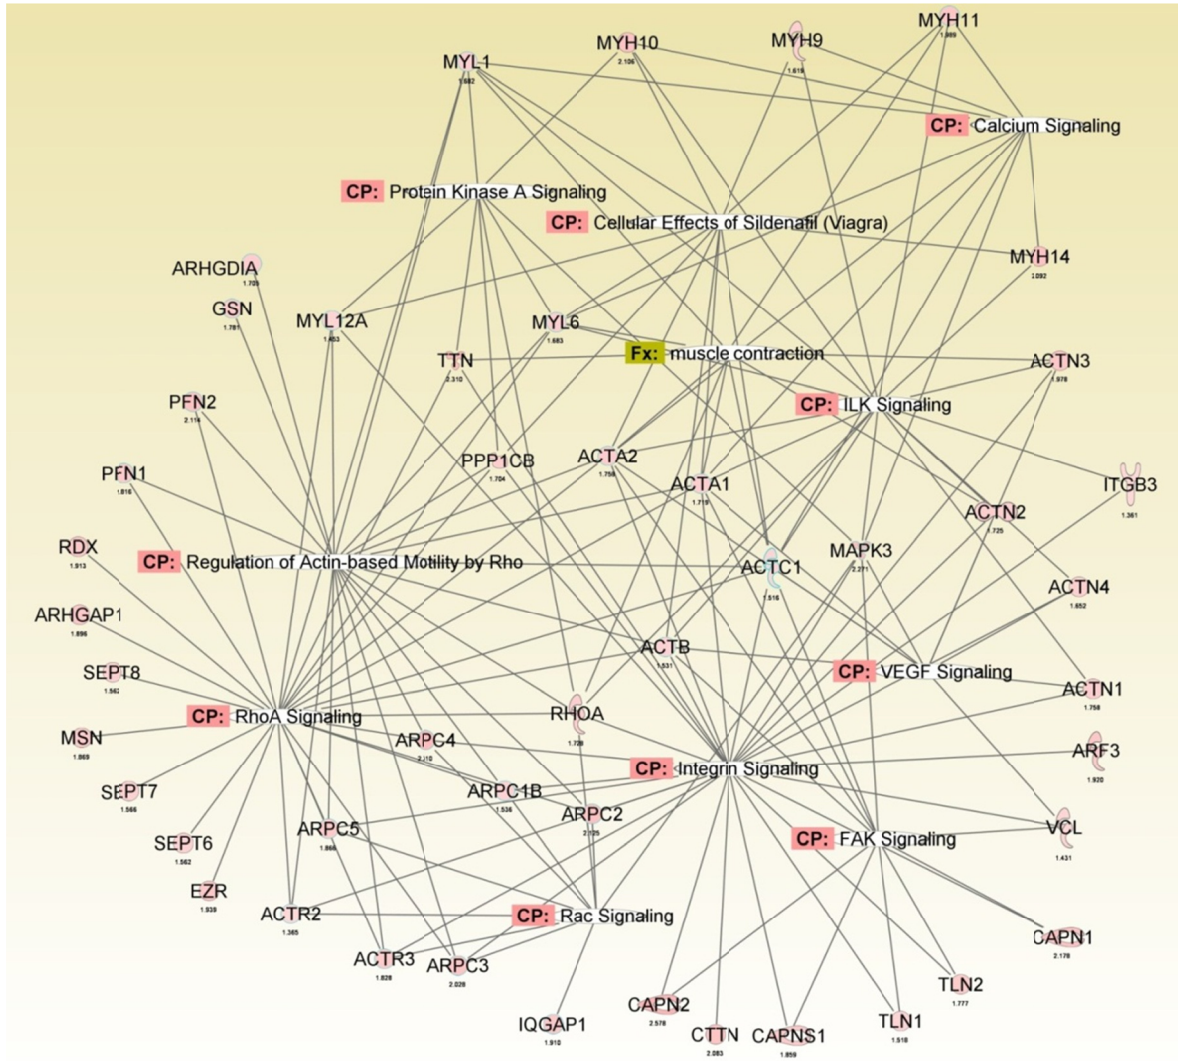

**Supplementary Table 1.** Differentially expressed proteins in Control and PAH PASM cells, in the absence and presence of ET-1. This table is presented as a separate Microsoft Excel file.

**Supplementary Table 2.** Detailed description of protein expression changes in described canonical pathways. The table shows the Symbol, Entrez Gene Name and Entrez Gene ID of the proteins. The fold changes of the proteins are shown for the four comparisons. A1: the change of protein expression in ET-1 treated vs. basal in Control PASM; A2: the change of protein expression in ET-1 treated vs. basal in the PAH PASM; A3: the change of protein expression in PAH cells vs. Control cells without ET-1 stimulation; A4: the change of protein expression in PAH cells vs. Control cells, both with ET-1 stimulation.

### 1. eIF2 (Eukaryotic Initiation Factor 2) signaling

| Symbol | Entrez Gene Name                                       | Fold Change (A1) | Fold Change (A2) | Fold Change (A3) | Fold Change (A4) |
|--------|--------------------------------------------------------|------------------|------------------|------------------|------------------|
| EIF3L  | eukaryotic translation initiation factor 3, subunit L  | 1.95             | 1.68             | 1.81             | 1.56             |
| EIF4A1 | eukaryotic translation initiation factor 4A1           | 1.80             | 2.20             | 1.37             | 1.67             |
| EIF4A2 | eukaryotic translation initiation factor 4A2           | 1.71             | 2.07             | 1.36             | 1.64             |
| EIF4G1 | eukaryotic translation initiation factor 4 gamma, 1    | 1.79             | 2.52             | 1.47             | 2.07             |
| EIF4G3 | eukaryotic translation initiation factor 4 gamma, 3    | 1.35             | 2.24             | 1.20             | 1.99             |
| PABPC1 | poly(A) binding protein, cytoplasmic 1                 | 1.68             | 2.22             | 1.03             | 1.37             |
| PPP1CB | protein phosphatase 1, catalytic subunit, beta isozyme | 2.38             | 2.93             | 1.39             | 1.               |
| PPP1CC | protein phosphatase 1,                                 | 2.38             | 2.93             | 1.39             | 1.70             |

| Symbol                  | Entrez Gene Name                 | Fold Change (A1) | Fold Change (A2) | Fold Change (A3) | Fold Change (A4) |
|-------------------------|----------------------------------|------------------|------------------|------------------|------------------|
|                         | catalytic subunit, gamma isozyme |                  |                  |                  |                  |
| RPL4                    | ribosomal protein L4             | 2.56             | 3.01             | 1.51             | 1.78             |
| RPL5                    | ribosomal protein L5             | 1.50             | 2.73             | -1.42            | 1.29             |
| RPL7                    | ribosomal protein L7             | 1.38             | 1.60             | -1.02            | 1.14             |
| RPL8                    | ribosomal protein L8             | 1.68             | 3.06             | -1.25            | 1.47             |
| RPL9                    | ribosomal protein L9             | 1.99             | 2.49             | 1.09             | 1.36             |
| RPL13                   | ribosomal protein L13            | 1.44             | 2.33             | -1.21            | 1.33             |
| RPL14                   | ribosomal protein L14            | 1.92             | 2.25             | 1.37             | 1.61             |
| RPL15                   | ribosomal protein L15            | 1.41             | 2.80             | -1.23            | 1.61             |
| RPL19                   | ribosomal protein L19            | 1.50             | 3.47             | -1.21            | 1.91             |
| RPL21                   | ribosomal protein L21            | 1.68             | 2.26             | -1.08            | 1.25             |
| RPL22                   | ribosomal protein L22            | 1.36             | 2.86             | -1.41            | 1.50             |
| RPL24                   | ribosomal protein L24            | 1.60             | 2.03             | 1.13             | 1.44             |
| RPL30                   | ribosomal protein L30            | 1.68             | 2.55             | -1.07            | 1.42             |
| RPL10 (includes others) | ribosomal protein L10            | 1.63             | 2.16             | -1.02            | 1.30             |
| RPL13A                  | ribosomal protein L13a           | 1.70             | 3.35             | -1.34            | 1.48             |
| RPL18A                  | ribosomal protein L18a           | 1.83             | 2.45             | -1.05            | 1.27             |
| RPL23A                  | ribosomal protein L23a           | 1.71             | 2.97             | -1.13            | 1.53             |
| RPL35A                  | ribosomal protein L35a           | 1.35             | 2.33             | -1.29            | 1.34             |
| RPL7A                   | ribosomal protein L7a            | 1.54             | 2.16             | -1.12            | 1.25             |
| RPLP0                   | ribosomal protein, large, P0     | 2.23             | 3.23             | 1.17             | 1.60             |
| RPLP2                   | ribosomal protein, large, P2     | 2.28             | 2.72             | 1.28             | 1.53             |

| <b>Symbol</b> | <b>Entrez Gene Name</b>          | <b>Fold Change (A1)</b> | <b>Fold Change (A2)</b> | <b>Fold Change (A3)</b> | <b>Fold Change (A4)</b> |
|---------------|----------------------------------|-------------------------|-------------------------|-------------------------|-------------------------|
| RPS2          | ribosomal protein S2             | 1.54                    | 2.42                    | 1.16                    | 1.82                    |
| RPS3          | ribosomal protein S3             | 1.66                    | 2.40                    | 1.00                    | 1.45                    |
| RPS7          | ribosomal protein S7             | 1.51                    | 1.76                    | -1.07                   | 1.10                    |
| RPS9          | ribosomal protein S9             | 1.86                    | 3.48                    | 1.08                    | 2.01                    |
| RPS10         | ribosomal protein S10            | 2.31                    | 3.75                    | -1.13                   | 1.44                    |
| RPS11         | ribosomal protein S11            | 1.83                    | 3.01                    | -1.19                   | 1.38                    |
| RPS13         | ribosomal protein S13            | 2.40                    | 3.28                    | 1.27                    | 1.74                    |
| RPS16         | ribosomal protein S16            | 1.73                    | 3.35                    | -1.11                   | 1.74                    |
| RPS19         | ribosomal protein S19            | 1.35                    | 2.71                    | -1.33                   | 1.51                    |
| RPS24         | ribosomal protein S24            | 1.97                    | 2.36                    | 1.16                    | 1.39                    |
| RPS25         | ribosomal protein S25            | 1.82                    | 3.37                    | -1.34                   | 1.39                    |
| RPS26         | ribosomal protein S26            | 1.81                    | 2.32                    | 1.10                    | 1.41                    |
| RPS15A        | ribosomal protein S15a           | 1.86                    | 2.41                    | 1.17                    | 1.52                    |
| RPS27L        | ribosomal protein S27-like       | 1.35                    | 2.39                    | -1.06                   | 1.67                    |
| RPS3A         | ribosomal protein S3A            | 1.55                    | 2.49                    | -1.11                   | 1.45                    |
| RPS4X         | ribosomal protein S4, X-linked   | 1.73                    | 2.67                    | -1.13                   | 1.36                    |
| RPS4Y1        | ribosomal protein S4, Y-linked 1 | 1.60                    | 2.77                    | -1.52                   | 1.14                    |
| RPSA          | ribosomal protein SA             | 1.46                    | 2.10                    | -1.28                   | 1.12                    |

## 2. RhoA signaling

| Symbol  | Entrez Gene Name                                     | Fold Change (A1) | Fold Change (A2) | Fold Change (A3) | Fold Change (A4) |
|---------|------------------------------------------------------|------------------|------------------|------------------|------------------|
| ACTA1   | actin, alpha 1, skeletal muscle                      | 1.61             | 2.35             | 1.18             | 1.72             |
| ACTA2   | actin, alpha 2, smooth muscle, aorta                 | 1.64             | 2.34             | 1.23             | 1.77             |
| ACTB    | actin, beta                                          | 1.70             | 2.03             | 1.28             | 1.53             |
| ACTC1   | actin, alpha, cardiac muscle 1                       | 1.42             | 1.83             | 1.17             | 1.52             |
| ACTR2   | ARP2 actin-related protein 2 homolog (yeast)         | 1.66             | 1.75             | 1.30             | 1.37             |
| ACTR3   | ARP3 actin-related protein 3 homolog (yeast)         | 1.87             | 2.51             | 1.36             | 1.83             |
| ARHGAP1 | Rho GTPase activating protein 1                      | 1.41             | 1.75             | 1.53             | 1.90             |
| ARPC2   | actin related protein 2/3 complex, subunit 2, 34kDa  | 2.05             | 3.40             | 1.28             | 2.13             |
| ARPC3   | actin related protein 2/3 complex, subunit 3, 21kDa  | 1.86             | 2.77             | 1.36             | 2.03             |
| ARPC4   | actin related protein 2/3 complex, subunit 4, 20kDa  | 2.36             | 3.40             | 1.60             | 2.31             |
| ARPC5   | actin related protein 2/3 complex, subunit 5, 16kDa  | 1.59             | 2.95             | 1.00             | 1.87             |
| ARPC1B  | actin related protein 2/3 complex, subunit 1B, 41kDa | 1.90             | 2.74             | 1.07             | 1.54             |
| CFL1    | cofilin 1 (non-muscle)                               | 1.48             | 2.03             | -1.29            | 1.06             |
| CFL2    | cofilin 2 (muscle)                                   | 1.34             | 1.95             | -1.21            | 1.20             |
| EZR     | ezrin                                                | 1.75             | 2.04             | 1.66             | 1.94             |
| MSN     | moesin                                               | 1.87             | 2.31             | 1.51             | 1.87             |

| <b>Symbol</b> | <b>Entrez Gene Name</b>                                     | <b>Fold Change (A1)</b> | <b>Fold Change (A2)</b> | <b>Fold Change (A3)</b> | <b>Fold Change (A4)</b> |
|---------------|-------------------------------------------------------------|-------------------------|-------------------------|-------------------------|-------------------------|
| MYL1          | myosin, light chain 1, alkali; skeletal, fast               | 1.72                    | 2.81                    | 1.03                    | 1.68                    |
| MYL6          | myosin, light chain 6, alkali, smooth muscle and non-muscle | 1.46                    | 2.42                    | 1.02                    | 1.63                    |
| MYL12A        | myosin, light chain 12A, regulatory, non-sarcomeric         | 1.94                    | 2.05                    | 1.38                    | 1.45                    |
| PFN1          | profilin 1                                                  | 1.72                    | 2.40                    | 1.30                    | 1.82                    |
| PPP1CB        | protein phosphatase 1, catalytic subunit, beta isozyme      | 2.38                    | 2.93                    | 1.39                    | 1.70                    |
| RDX           | radixin                                                     | 1.79                    | 2.14                    | 1.60                    | 1.91                    |
| RHOA          | ras homolog family member A                                 | 1.38                    | 2.10                    | 1.13                    | 1.73                    |
| SEPT2         | septin 2                                                    | 1.72                    | 1.95                    | 1.17                    | 1.32                    |
| SEPT6         | septin 6                                                    | 1.88                    | 2.62                    | 1.12                    | 1.56                    |
| SEPT7         | septin 7                                                    | 1.78                    | 2.58                    | 1.08                    | 1.57                    |
| SEPT8         | septin 8                                                    | 1.88                    | 2.62                    | 1.12                    | 1.56                    |
| TTN           | titin                                                       | 1.84                    | 3.88                    | 1.10                    | 2.31                    |



### 3. Actin Cytoskeleton associated Signaling

| Symbol | Entrez Gene Name                                     | Fold Change (A1) | Fold Change (A2) | Fold Change (A3) | Fold Change (A4) |
|--------|------------------------------------------------------|------------------|------------------|------------------|------------------|
| ACTA1  | actin, alpha 1, skeletal muscle                      | 1.61             | 2.35             | 1.18             | 1.72             |
| ACTA2  | actin, alpha 2, smooth muscle, aorta                 | 1.64             | 2.34             | 1.23             | 1.76             |
| ACTB   | actin, beta                                          | 1.70             | 2.03             | 1.28             | 1.53             |
| ACTC1  | actin, alpha, cardiac muscle 1                       | 1.42             | 1.83             | 1.17             | 1.52             |
| ACTN1  | actinin, alpha 1                                     | 1.64             | 2.05             | 1.41             | 1.76             |
| ACTN2  | actinin, alpha 2                                     | 1.55             | 2.30             | 1.17             | 1.73             |
| ACTN3  | actinin, alpha 3                                     | 1.74             | 2.52             | 1.36             | 1.98             |
| ACTN4  | actinin, alpha 4                                     | 1.65             | 2.10             | 1.30             | 1.65             |
| ACTR2  | ARP2 actin-related protein 2 homolog (yeast)         | 1.66             | 1.75             | 1.30             | 1.37             |
| ACTR3  | ARP3 actin-related protein 3 homolog (yeast)         | 1.87             | 2.51             | 1.36             | 1.83             |
| ARPC2  | actin related protein 2/3 complex, subunit 2, 34kDa  | 2.05             | 3.40             | 1.28             | 2.13             |
| ARPC3  | actin related protein 2/3 complex, subunit 3, 21kDa  | 1.86             | 2.77             | 1.36             | 2.03             |
| ARPC4  | actin related protein 2/3 complex, subunit 4, 20kDa  | 2.36             | 3.40             | 1.60             | 2.31             |
| ARPC5  | actin related protein 2/3 complex, subunit 5, 16kDa  | 1.59             | 2.95             | 1.00             | 1.87             |
| ARPC1B | actin related protein 2/3 complex, subunit 1B, 41kDa | 1.90             | 2.74             | 1.07             | 1.54             |
| CFL1   | cofilin 1 (non-muscle)                               | 1.48             | 2.03             | -1.29            | 1.06             |
| CFL2   | cofilin 2 (muscle)                                   | 1.34             | 1.95             | -1.21            | 1.20             |
| EZR    | ezrin                                                | 1.75             | 2.04             | 1.66             | 1.94             |

| <b>Symbol</b> | <b>Entrez Gene Name</b>                                                                      | <b>Fold Change (A1)</b> | <b>Fold Change (A2)</b> | <b>Fold Change (A3)</b> | <b>Fold Change (A4)</b> |
|---------------|----------------------------------------------------------------------------------------------|-------------------------|-------------------------|-------------------------|-------------------------|
| FN1           | fibronectin 1                                                                                | 1.42                    | 1.94                    | -1.18                   | 1.16                    |
| GSN           | gelsolin                                                                                     | 1.70                    | 2.28                    | 1.33                    | 1.78                    |
| IQGAP1        | IQ motif containing GTPase activating protein 1                                              | 1.64                    | 2.22                    | 1.41                    | 1.91                    |
| ITGB1         | integrin, beta 1 (fibronectin receptor, beta polypeptide, antigen CD29 includes MDF2, MSK12) | 1.50                    | 2.41                    | -1.24                   | 1.29                    |
| MSN           | moesin                                                                                       | 1.87                    | 2.31                    | 1.51                    | 1.87                    |
| MYH9          | myosin, heavy chain 9, non-muscle                                                            | 1.53                    | 1.99                    | 1.24                    | 1.62                    |
| MYH10         | myosin, heavy chain 10, non-muscle                                                           | 1.68                    | 2.52                    | 1.41                    | 2.11                    |
| MYH11         | myosin, heavy chain 11, smooth muscle                                                        | 1.73                    | 2.62                    | 1.32                    | 1.99                    |
| MYH14         | myosin, heavy chain 14, non-muscle                                                           | 2.06                    | 3.03                    | 1.42                    | 2.09                    |
| MYL1          | myosin, light chain 1, alkali; skeletal, fast                                                | 1.72                    | 2.81                    | 1.03                    | 1.68                    |
| MYL6          | myosin, light chain 6, alkali, smooth muscle and non-muscle                                  | 1.46                    | 2.42                    | 1.02                    | 1.68                    |
| MYL12A        | myosin, light chain 12A, regulatory, non-sarcomeric                                          | 1.94                    | 2.05                    | 1.38                    | 1.45                    |
| PFN1          | profilin 1                                                                                   | 1.72                    | 2.40                    | 1.30                    | 1.82                    |
| PPP1CB        | protein phosphatase 1, catalytic subunit, beta isozyme                                       | 2.38                    | 2.93                    | 1.39                    | 1.70                    |
| RDX           | radixin                                                                                      | 1.79                    | 2.14                    | 1.60                    | 1.91                    |
| RHOA          | ras homolog family member                                                                    | 1.38                    | 2.10                    | 1.13                    | 1.73                    |

| Symbol | Entrez Gene Name | Fold Change (A1) | Fold Change (A2) | Fold Change (A3) | Fold Change (A4) |
|--------|------------------|------------------|------------------|------------------|------------------|
|        | A                |                  |                  |                  |                  |
| TTN    | titin            | 1.84             | 3.88             | 1.10             | 2.31             |
| VCL    | vinculin         | 1.67             | 2.05             | 1.17             | 1.431            |

#### 4. Regulation of eIF4 and p70S6K Signaling

| Symbol  | Entrez Gene Name                                                                             | Fold Change (A1) | Fold Change (A2) | Fold Change (A3) | Fold Change (A4) |
|---------|----------------------------------------------------------------------------------------------|------------------|------------------|------------------|------------------|
| EIF3L   | eukaryotic translation initiation factor 3, subunit L                                        | 1.95             | 1.68             | 1.81             | 1.56             |
| EIF4A1  | eukaryotic translation initiation factor 4A1                                                 | 1.80             | 2.20             | 1.37             | 1.67             |
| EIF4A2  | eukaryotic translation initiation factor 4A2                                                 | 1.71             | 2.07             | 1.36             | 1.64             |
| EIF4G1  | eukaryotic translation initiation factor 4 gamma, 1                                          | 1.79             | 2.52             | 1.47             | 2.07             |
| EIF4G3  | eukaryotic translation initiation factor 4 gamma, 3                                          | 1.35             | 2.24             | 1.20             | 1.99             |
| ITGB1   | integrin, beta 1 (fibronectin receptor, beta polypeptide, antigen CD29 includes MDF2, MSK12) | 1.50             | 2.41             | -1.24            | 1.29             |
| PABPC1  | poly(A) binding protein, cytoplasmic 1                                                       | 1.68             | 2.22             | 1.03             | 1.37             |
| PPP2R1A | protein phosphatase 2, regulatory subunit A, alpha                                           | 1.54             | 1.97             | 1.37             | 1.76             |
| RPS2    | ribosomal protein S2                                                                         | 1.54             | 2.42             | 1.16             | 1.82             |

| <b>Symbol</b> | <b>Entrez Gene Name</b>          | <b>Fold Change (A1)</b> | <b>Fold Change (A2)</b> | <b>Fold Change (A3)</b> | <b>Fold Change (A4)</b> |
|---------------|----------------------------------|-------------------------|-------------------------|-------------------------|-------------------------|
| RPS3          | ribosomal protein S3             | 1.66                    | 2.40                    | 1.00                    | 1.45                    |
| RPS7          | ribosomal protein S7             | 1.51                    | 1.76                    | -1.07                   | 1.10                    |
| RPS9          | ribosomal protein S9             | 1.86                    | 3.48                    | 1.08                    | 2.01                    |
| RPS10         | ribosomal protein S10            | 2.31                    | 3.75                    | -1.13                   | 1.44                    |
| RPS11         | ribosomal protein S11            | 1.83                    | 3.01                    | -1.19                   | 1.38                    |
| RPS13         | ribosomal protein S13            | 2.40                    | 3.28                    | 1.27                    | 1.74                    |
| RPS16         | ribosomal protein S16            | 1.73                    | 3.35                    | -1.11                   | 1.74                    |
| RPS19         | ribosomal protein S19            | 1.35                    | 2.71                    | -1.33                   | 1.51                    |
| RPS24         | ribosomal protein S24            | 1.97                    | 2.36                    | 1.16                    | 1.39                    |
| RPS25         | ribosomal protein S25            | 1.82                    | 3.37                    | -1.34                   | 1.39                    |
| RPS26         | ribosomal protein S26            | 1.81                    | 2.32                    | 1.10                    | 1.41                    |
| RPS15A        | ribosomal protein S15a           | 1.86                    | 2.41                    | 1.17                    | 1.52                    |
| RPS27L        | ribosomal protein S27-like       | 1.35                    | 2.39                    | -1.06                   | 1.67                    |
| RPS3A         | ribosomal protein S3A            | 1.55                    | 2.49                    | -1.11                   | 1.45                    |
| RPS4X         | ribosomal protein S4, X-linked   | 1.73                    | 2.67                    | -1.13                   | 1.36                    |
| RPS4Y1        | ribosomal protein S4, Y-linked 1 | 1.60                    | 2.77                    | -1.52                   | 1.14                    |
| RPSA          | ribosomal protein SA             | 1.46                    | 2.10                    | -1.28                   | 1.12                    |

## 5. 14-3-3-mediated Signaling

| Symbol  | Entrez Gene Name                                                                         | Fold Change (A1) | Fold Change (A2) | Fold Change (A3) | Fold Change (A4) |
|---------|------------------------------------------------------------------------------------------|------------------|------------------|------------------|------------------|
| PDCD6IP | programmed cell death 6 interacting protein                                              | 1.47             | 2.02             | 1.433            | 1.966            |
| PDIA3   | protein disulfide isomerase family A, member 3                                           | 1.61             | 2.41             | 1.02             | 1.53             |
| TUBA8   | tubulin, alpha 8                                                                         | 1.68             | 2.12             | 1.17             | 1.48             |
| TUBA1A  | tubulin, alpha 1a                                                                        | 1.79             | 2.07             | 1.22             | 1.41             |
| TUBA1B  | tubulin, alpha 1b                                                                        | 1.46             | 1.80             | 1.05             | 1.29             |
| TUBA1C  | tubulin, alpha 1c                                                                        | 1.68             | 2.12             | 1.17             | 1.48             |
| TUBA4A  | tubulin, alpha 4a                                                                        | 1.62             | 2.00             | 1.76             | 2.17             |
| TUBA4B  | tubulin, alpha 4b (pseudogene)                                                           | 2.21             | 2.11             | 1.39             | 1.32             |
| TUBB1   | tubulin, beta 1 class VI                                                                 | 2.01             | 2.45             | 1.16             | 1.41             |
| TUBB3   | tubulin, beta 3 class III                                                                | 1.41             | 1.72             | 1.63             | 1.98             |
| TUBB4   | tubulin, beta 4A class IVa                                                               | 1.62             | 1.91             | 1.43             | 1.68             |
| TUBB6   | tubulin, beta 6 class V                                                                  | 1.43             | 1.85             | 1.58             | 2.03             |
| TUBB8   | tubulin, beta 8 class VIII                                                               | 2.03             | 2.52             | 1.08             | 1.34             |
| TUBB    | tubulin, beta class I                                                                    | 1.73             | 2.32             | 1.05             | 1.41             |
| TUBB2A  | tubulin, beta 2A class IIa                                                               | 1.49             | 2.20             | -1.18            | 1.25             |
| TUBB2C  | tubulin, beta 4B class IVb                                                               | 1.43             | 2.75             | -1.59            | 1.21             |
| TUBB4Q  | --                                                                                       | 2.03             | 2.52             | 1.18             | 1.34             |
| VIM     | vimentin                                                                                 | 1.56             | 2.12             | 1.25             | 1.69             |
| YWHAB   | tyrosine 3-monooxygenase/tryptophan 5-monooxygenase activation protein, beta polypeptide | 1.80             | 2.68             | 1.13             | 1.68             |
| YWHAE   | tyrosine 3-monooxygenase/tryptophan 5-monooxygenase activation                           | 1.88             | 3.85             | -1.04            | 1.97             |

| <b>Symbol</b> | <b>Entrez Gene Name</b>                                                                   | <b>Fold Change (A1)</b> | <b>Fold Change (A2)</b> | <b>Fold Change (A3)</b> | <b>Fold Change (A4)</b> |
|---------------|-------------------------------------------------------------------------------------------|-------------------------|-------------------------|-------------------------|-------------------------|
|               | protein, epsilon polypeptide                                                              |                         |                         |                         |                         |
| YWHAG         | tyrosine 3-monooxygenase/tryptophan 5-monooxygenase activation protein, gamma polypeptide | 1.68                    | 2.40                    | -1.19                   | 1.20                    |
| YWHAQ         | tyrosine 3-monooxygenase/tryptophan 5-monooxygenase activation protein, theta polypeptide | 1.63                    | 2.14                    | -1.07                   | 1.22                    |
| YWHAZ         | tyrosine 3-monooxygenase/tryptophan 5-monooxygenase activation protein, zeta polypeptide  | 1.85                    | 2.76                    | 1.23                    | 1.84                    |

## 6. Integrin Signaling

| Symbol | Entrez Gene Name                                     | Fold Change (A1#) | Fold Change (A2) | Fold Change (A3) | Fold Change (A4) |
|--------|------------------------------------------------------|-------------------|------------------|------------------|------------------|
| ACTA1  | actin, alpha 1, skeletal muscle                      | 1.61              | 2.35             | 1.18             | 1.72             |
| ACTA2  | actin, alpha 2, smooth muscle, aorta                 | 1.642             | 2.34             | 1.23             | 1.76             |
| ACTB   | actin, beta                                          | 1.69              | 2.03             | 1.28             | 1.53             |
| ACTC1  | actin, alpha, cardiac muscle 1                       | 1.42              | 1.83             | 1.17             | 1.52             |
| ACTN1  | actinin, alpha 1                                     | 1.64              | 2.05             | 1.41             | 1.76             |
| ACTN2  | actinin, alpha 2                                     | 1.55              | 2.30             | 1.17             | 1.73             |
| ACTN3  | actinin, alpha 3                                     | 1.74              | 2.52             | 1.36             | 1.98             |
| ACTN4  | actinin, alpha 4                                     | 1.65              | 2.10             | 1.30             | 1.65             |
| ACTR2  | ARP2 actin-related protein 2 homolog (yeast)         | 1.66              | 1.75             | 1.30             | 1.37             |
| ACTR3  | ARP3 actin-related protein 3 homolog (yeast)         | 1.87              | 2.51             | 1.36             | 1.83             |
| ARF3   | ADP-ribosylation factor 3                            | 2.87              | 3.65             | 1.511            | 1.92             |
| ARPC2  | actin related protein 2/3 complex, subunit 2, 34kDa  | 2.05              | 3.40             | 1.28             | 2.13             |
| ARPC3  | actin related protein 2/3 complex, subunit 3, 21kDa  | 1.86              | 2.77             | 1.36             | 2.03             |
| ARPC4  | actin related protein 2/3 complex, subunit 4, 20kDa  | 2.36              | 3.40             | 1.60             | 2.31             |
| ARPC5  | actin related protein 2/3 complex, subunit 5, 16kDa  | 1.59              | 2.95             | 1.00             | 1.87             |
| ARPC1B | actin related protein 2/3 complex, subunit 1B, 41kDa | 1.90              | 2.74             | 1.07             | 1.54             |

| <b>Symbol</b> | <b>Entrez Gene Name</b>                                                                      | <b>Fold Change (A1#)</b> | <b>Fold Change (A2)</b> | <b>Fold Change (A3)</b> | <b>Fold Change (A4)</b> |
|---------------|----------------------------------------------------------------------------------------------|--------------------------|-------------------------|-------------------------|-------------------------|
| CAPN2         | calpain 2, (m/II) large subunit                                                              | 1.37                     | 1.93                    | 1.838                   | 2.58                    |
| CAPNS1        | calpain, small subunit 1                                                                     | 1.510                    | 2.07                    | 1.36                    | 1.869                   |
| CTTN          | cortactin                                                                                    | 1.710                    | 3.57                    | 1.00                    | 2.08                    |
| ITGB1         | integrin, beta 1 (fibronectin receptor, beta polypeptide, antigen CD29 includes MDF2, MSK12) | 1.50                     | 2.41                    | -1.24                   | 1.29                    |
| ITGB3         | integrin, beta 3 (platelet glycoprotein IIIa, antigen CD61)                                  | 1.46                     | 3.13                    | -1.57                   | 1.36                    |
| MYL12A        | myosin, light chain 12A, regulatory, non-sarcomeric                                          | 1.94                     | 2.05                    | 1.38                    | 1.45                    |
| PPP1CB        | protein phosphatase 1, catalytic subunit, beta isozyme                                       | 2.38                     | 2.93                    | 1.39                    | 1.70                    |
| RHOA          | ras homolog family member A                                                                  | 1.38                     | 2.10                    | 1.13                    | 1.73                    |
| TLN1          | talin 1                                                                                      | 1.54                     | 2.28                    | 1.02                    | 1.52                    |
| TLN2          | talin 2                                                                                      | 1.44                     | 2.61                    | -1.02                   | 1.78                    |
| TTN           | titin                                                                                        | 1.84                     | 3.88                    | 1.10                    | 2.31                    |
| VCL           | vinculin                                                                                     | 1.67                     | 2.05                    | 1.12                    | 1.43                    |
| ZYX           | zyxin                                                                                        | 1.38                     | 2.34                    | -1.42                   | 1.19                    |



## 7. Regulation of Actin-based Motility by Rho

| Symbol | Entrez Gene Name                                            | Fold Change (A1) | Fold Change (A2) | Fold Change (A3) | Fold Change (A4) |
|--------|-------------------------------------------------------------|------------------|------------------|------------------|------------------|
| ACTA1  | actin, alpha 1, skeletal muscle                             | 1.61             | 2.35             | 1.18             | 1.729            |
| ACTA2  | actin, alpha 2, smooth muscle, aorta                        | 1.64             | 2.34             | 1.23             | 1.76             |
| ACTB   | actin, beta                                                 | 1.70             | 2.03             | 1.28             | 1.53             |
| ACTC1  | actin, alpha, cardiac muscle 1                              | 1.42             | 1.83             | 1.17             | 1.52             |
| ACTR2  | ARP2 actin-related protein 2 homolog (yeast)                | 1.66             | 1.75             | 1.30             | 1.37             |
| ACTR3  | ARP3 actin-related protein 3 homolog (yeast)                | 1.87             | 2.51             | 1.36             | 1.83             |
| ARHGDI | Rho GDP dissociation inhibitor (GDI) alpha                  | 1.83             | 2.52             | 1.24             | 1.71             |
| ARPC2  | actin related protein 2/3 complex, subunit 2, 34kDa         | 2.05             | 3.40             | 1.28             | 2.13             |
| ARPC3  | actin related protein 2/3 complex, subunit 3, 21kDa         | 1.86             | 2.77             | 1.36             | 2.03             |
| ARPC4  | actin related protein 2/3 complex, subunit 4, 20kDa         | 2.36             | 3.40             | 1.60             | 2.31             |
| ARPC5  | actin related protein 2/3 complex, subunit 5, 16kDa         | 1.59             | 2.95             | 1.00             | 1.87             |
| ARPC1B | actin related protein 2/3 complex, subunit 1B, 41kDa        | 1.90             | 2.74             | 1.07             | 1.54             |
| CFL1   | cofilin 1 (non-muscle)                                      | 1.48             | 2.03             | -1.29            | 1.06             |
| GSN    | gelsolin                                                    | 1.70             | 2.28             | 1.33             | 1.78             |
| MYL1   | myosin, light chain 1, alkali; skeletal, fast               | 1.72             | 2.81             | 1.03             | 1.68             |
| MYL6   | myosin, light chain 6, alkali, smooth muscle and non-muscle | 1.46             | 2.42             | 1.02             | 1.68             |
| MYL12A | myosin, light chain 12A,                                    | 1.94             | 2.05             | 1.38             | 1.45             |

| <b>Symbol</b> | <b>Entrez Gene Name</b>                                | <b>Fold Change (A1)</b> | <b>Fold Change (A2)</b> | <b>Fold Change (A3)</b> | <b>Fold Change (A4)</b> |
|---------------|--------------------------------------------------------|-------------------------|-------------------------|-------------------------|-------------------------|
|               | regulatory, non-sarcomeric                             |                         |                         |                         |                         |
| PFN1          | profilin 1                                             | 1.72                    | 2.40                    | 1.30                    | 1.82                    |
| PPP1CB        | protein phosphatase 1, catalytic subunit, beta isozyme | 2.38                    | 2.93                    | 1.39                    | 1.70                    |
| RHOA          | ras homolog family member A                            | 1.38                    | 2.10                    | 1.13                    | 1.73                    |

## 8. Protein Ubiquitination Pathway

| Symbol   | Entrez Gene Name                                              | Fold Change (A1) | Fold Change (A2) | Fold Change (A3) | Fold Change (A4) |
|----------|---------------------------------------------------------------|------------------|------------------|------------------|------------------|
| DNAJB4   | DnaJ (Hsp40) homolog, subfamily B, member 4                   | 1.70             | 2.65             | 4.02             | 6.29             |
| HLA-B    | major histocompatibility complex, class I, B                  | 1.64             | 2.53             | 1.69             | 2.60             |
| HSP90AA1 | heat shock protein 90kDa alpha (cytosolic), class A member 1  | 1.91             | 2.48             | 1.33             | 1.73             |
| HSP90AB1 | heat shock protein 90kDa alpha (cytosolic), class B member 1  | 1.91             | 2.40             | 1.31             | 1.65             |
| HSP90B1  | heat shock protein 90kDa beta (Grp94), member 1               | 1.78             | 2.48             | 1.14             | 1.59             |
| HSPA2    | heat shock 70kDa protein 2                                    | 1.83             | 2.49             | 1.12             | 1.52             |
| HSPA5    | heat shock 70kDa protein 5 (glucose-regulated protein, 78kDa) | 1.80             | 2.37             | -1.02            | 1.29             |
| HSPA6    | heat shock 70kDa protein 6 (HSP70B')                          | 1.85             | 2.16             | 1.53             | 1.79             |
| HSPA8    | heat shock 70kDa protein 8                                    | 1.65             | 2.34             | -1.06            | 1.33             |
| HSPA9    | heat shock 70kDa protein 9 (mortalin)                         | 1.35             | 1.59             | 1.44             | 1.70             |
| HSPA1L   | heat shock 70kDa protein 1-like                               | 1.66             | 1.88             | 1.62             | 1.83             |
| HSPD1    | heat shock 60kDa protein 1 (chaperonin)                       | 1.89             | 2.36             | 1.31             | 1.63             |
| HSPE1    | heat shock 10kDa protein 1 (chaperonin 10)                    | 1.73             | 2.51             | 1.24             | 1.80             |
| PSMA1    | proteasome (prosome, macropain) subunit, $\alpha$ type, 1     | 2.10             | 2.89             | 1.30             | 1.79             |
| PSMA2    | proteasome (prosome, macropain) subunit, $\alpha$ type, 2     | 1.72             | 1.97             | 1.32             | 1.51             |
| PSMA3    | proteasome (prosome, macropain) subunit, $\alpha$ type, 3     | 1.52             | 2.28             | 1.01             | 1.52             |

| <b>Symbol</b> | <b>Entrez Gene Name</b>                                              | <b>Fold Change (A1)</b> | <b>Fold Change (A2)</b> | <b>Fold Change (A3)</b> | <b>Fold Change (A4)</b> |
|---------------|----------------------------------------------------------------------|-------------------------|-------------------------|-------------------------|-------------------------|
| PSMA5         | proteasome (prosome, macropain) subunit, $\alpha$ type, 5            | 1.99                    | 2.45                    | 1.36                    | 1.68                    |
| PSMA6         | proteasome (prosome, macropain) subunit, $\alpha$ type, 6            | 1.39                    | 2.56                    | -1.13                   | 1.63                    |
| PSMA7         | proteasome (prosome, macropain) subunit, $\alpha$ type, 7            | 1.80                    | 2.14                    | 1.21                    | 1.44                    |
| PSMB1         | proteasome (prosome, macropain) subunit, $\beta$ type, 1             | 1.60                    | 1.92                    | 1.21                    | 1.45                    |
| PSMB2         | proteasome (prosome, macropain) subunit, $\beta$ type, 2             | 1.42                    | 2.57                    | -1.01                   | 1.80                    |
| PSMB3         | proteasome (prosome, macropain) subunit, $\beta$ type, 3             | 2.02                    | 2.38                    | 1.40                    | 1.65                    |
| PSMC2         | proteasome (prosome, macropain) 26S subunit, ATPase, 2               | 1.50                    | 1.97                    | 1.07                    | 1.40                    |
| PSMD8         | proteasome (prosome, macropain) 26S subunit, non-ATPase, 8           | 1.91                    | 1.68                    | 1.88                    | 1.65                    |
| PSME1         | proteasome (prosome, macropain) activator subunit 1 (PA28 $\alpha$ ) | 2.56                    | 3.69                    | 1.56                    | 2.24                    |
| PSME2         | proteasome (prosome, macropain) activator subunit 2 (PA28 $\beta$ )  | 1.72                    | 2.17                    | 1.30                    | 1.64                    |
| UBA1          | ubiquitin-like modifier activating enzyme 1                          | 1.67                    | 2.05                    | 1.01                    | 1.24                    |
| UBE2N         | ubiquitin-conjugating enzyme E2N                                     | 1.78                    | 2.29                    | 1.28                    | 1.65                    |
| USO1          | USO1 vesicle docking protein homolog (yeast)                         | 1.97                    | 3.58                    | -1.10                   | 1.65                    |
| USP5          | ubiquitin specific peptidase 5 (isopeptidase T)                      | 1.52                    | 1.72                    | 1.58                    | 1.78                    |

## 9. Glycolysis/Gluconeogenesis

| Symbol  | Entrez Gene Name                                     | Fold Change (A1) | Fold Change (A2) | Fold Change (A3) | Fold Change (A4) |
|---------|------------------------------------------------------|------------------|------------------|------------------|------------------|
| ADH5    | alcohol dehydrogenase 5 (class III), chi polypeptide | 1.63             | 2.14             | 1.24             | 1.64             |
| ALDH9A1 | aldehyde dehydrogenase 9 family, member A1           | 1.55             | 2.27             |                  | 2.62             |
| ALDOA   | aldolase A, fructose-bisphosphate                    | 1.45             | 1.99             | -1.16            | 1.19             |
| ENO1    | enolase 1, (alpha)                                   | 1.46             | 1.87             | 1.03             | 1.32             |
| ENO2    | enolase 2 (gamma, neuronal)                          | 1.59             | 1.72             | 1.28             | 1.38             |
| ENO3    | enolase 3 (beta, muscle)                             | 1.60             | 1.71             | 1.27             | 1.37             |
| GAPDH   | glyceraldehyde-3-phosphate dehydrogenase             | 1.59             | 1.93             | 1.06             | 1.28             |
| GPI     | glucose-6-phosphate isomerase                        | 1.57             | 1.98             | 1.31             | 1.66             |
| HK1     | hexokinase 1                                         | 1.43             | 1.62             | 1.69             | 1.92             |
| LDHA    | lactate dehydrogenase A                              | 1.70             | 2.88             | 1.33             | 2.26             |
| LDHAL6A | lactate dehydrogenase A-like 6A                      | 1.41             | 2.70             | 1.11             | 2.13             |
| LDHAL6B | lactate dehydrogenase A-like 6B                      | 2.33             | 3.30             | 1.86             | 2.64             |
| LDHB    | lactate dehydrogenase B                              | 1.49             | 2.59             | 1.17             | 2.05             |
| PFKL    | phosphofructokinase, liver                           | 1.74             | 2.37             | 1.17             | 1.60             |
| PGAM1   | phosphoglycerate mutase 1 (brain)                    | 1.33             | 2.12             | -1.28            | 1.24             |
| PGK1    | phosphoglycerate kinase 1                            | 1.64             | 2.40             | -1.21            | 1.21             |
| PGK2    | phosphoglycerate kinase 2                            | 1.75             | 2.42             | -1.15            | 1.20             |
| PGM1    | phosphoglucomutase 1                                 | 2.09             | 1.92             | 1.97             | 1.81             |

| <b>Symbol</b> | <b>Entrez Gene Name</b>     | <b>Fold Change (A1)</b> | <b>Fold Change (A2)</b> | <b>Fold Change (A3)</b> | <b>Fold Change (A4)</b> |
|---------------|-----------------------------|-------------------------|-------------------------|-------------------------|-------------------------|
| PKM2          | pyruvate kinase, muscle     | 1.69                    | 1.74                    | 1.107                   | 1.13                    |
| TPI1          | triosephosphate isomerase 1 | 1.43                    | 2.36                    | -1.23                   | 1.34                    |

**10. ILK (Integrin Linked Kinase) Signaling**

| <b>Symbol</b> | <b>Entrez Gene Name</b>                                                                      | <b>Fold Change (A1#)</b> | <b>Fold Change (A2)</b> | <b>Fold Change (A3)</b> | <b>Fold Change (A4)</b> |
|---------------|----------------------------------------------------------------------------------------------|--------------------------|-------------------------|-------------------------|-------------------------|
| ACTA1         | actin, alpha 1, skeletal muscle                                                              | 1.61                     | 2.35                    | 1.18                    | 1.72                    |
| ACTA2         | actin, alpha 2, smooth muscle, aorta                                                         | 1.64                     | 2.34                    | 1.23                    | 1.76                    |
| ACTB          | actin, beta                                                                                  | 1.70                     | 2.03                    | 1.28                    | 1.53                    |
| ACTC1         | actin, alpha, cardiac muscle 1                                                               | 1.42                     | 1.83                    | 1.17                    | 1.526                   |
| ACTN1         | actinin, alpha 1                                                                             | 1.64                     | 2.05                    | 1.41                    | 1.76                    |
| ACTN2         | actinin, alpha 2                                                                             | 1.55                     | 2.30                    | 1.17                    | 1.73                    |
| ACTN3         | actinin, alpha 3                                                                             | 1.74                     | 2.52                    | 1.36                    | 1.98                    |
| ACTN4         | actinin, alpha 4                                                                             | 1.65                     | 2.10                    | 1.30                    | 1.65                    |
| CFL1          | cofilin 1 (non-muscle)                                                                       | 1.48                     | 2.03                    | -1.29                   | 1.06                    |
| CFL2          | cofilin 2 (muscle)                                                                           | 1.34                     | 1.95                    | -1.21                   | 1.20                    |
| FLNA          | filamin A, alpha                                                                             | 1.57                     | 2.04                    | 1.49                    | 1.94                    |
| FLNB          | filamin B, beta                                                                              | 1.97                     | 2.20                    | 1.41                    | 1.58                    |
| FLNC          | filamin C, gamma                                                                             | 1.47                     | 1.85                    | -1.58                   | -1.26                   |
| FN1           | fibronectin 1                                                                                | 1.42                     | 1.94                    | -1.18                   | 1.16                    |
| ITGB1         | integrin, beta 1 (fibronectin receptor, beta polypeptide, antigen CD29 includes MDF2, MSK12) | 1.50                     | 2.41                    | -1.24                   | 1.29                    |
| ITGB3         | integrin, beta 3 (platelet glycoprotein IIIa, antigen CD61)                                  | 1.46                     | 3.13                    | -1.57                   | 1.36                    |
| MYH9          | myosin, heavy chain 9, non-muscle                                                            | 1.53                     | 1.99                    | 1.24                    | 1.62                    |
| MYH10         | myosin, heavy chain 10, non-muscle                                                           | 1.68                     | 2.52                    | 1.41                    | 2.11                    |

| <b>Symbol</b> | <b>Entrez Gene Name</b>                                     | <b>Fold Change (A1#)</b> | <b>Fold Change (A2)</b> | <b>Fold Change (A3)</b> | <b>Fold Change (A4)</b> |
|---------------|-------------------------------------------------------------|--------------------------|-------------------------|-------------------------|-------------------------|
| MYH11         | myosin, heavy chain 11, smooth muscle                       | 1.73                     | 2.62                    | 1.32                    | 1.99                    |
| MYH14         | myosin, heavy chain 14, non-muscle                          | 2.06                     | 3.03                    | 1.42                    | 2.09                    |
| MYL1          | myosin, light chain 1, alkali; skeletal, fast               | 1.72                     | 2.81                    | 1.03                    | 1.68                    |
| MYL6          | myosin, light chain 6, alkali, smooth muscle and non-muscle | 1.46                     | 2.42                    | 1.02                    | 1.68                    |
| PPP2R1A       | protein phosphatase 2, regulatory subunit A, alpha          | 1.54                     | 1.97                    | 1.37                    | 1.76                    |
| RHOA          | ras homolog family member A                                 | 1.38                     | 2.10                    | 1.13                    | 1.73                    |
| VIM           | vimentin                                                    | 1.57                     | 2.12                    | 1.25                    | 1.69                    |



## 11. Protein Kinase A Signaling

| Symbol  | Entrez Gene Name                                                             | Fold Change (A1) | Fold Change (A2) | Fold Change (A3) | Fold Change (A4) |
|---------|------------------------------------------------------------------------------|------------------|------------------|------------------|------------------|
| AKAP12  | A kinase (PRKA) anchor protein 12                                            | 1.36             | 1.87             | -3.80            | -2.77            |
| CAMK2A  | calcium/calmodulin-dependent protein kinase II $\alpha$                      | 1.71             | 1.90             | 1.54             | 1.71             |
| CAMK2B  | calcium/calmodulin-dependent protein kinase II $\beta$                       | 1.63             | 2.03             | 1.38             | 1.71             |
| CAMK2D  | calcium/calmodulin-dependent protein kinase II $\delta$                      | 1.72             | 2.22             | 1.42             | 1.83             |
| CAMK2G  | calcium/calmodulin-dependent protein kinase II $\gamma$                      | 1.63             | 2.03             | 1.38             | 1.71             |
| FLNA    | filamin A, $\alpha$                                                          | 1.57             | 2.04             | 1.49             | 1.94             |
| FLNB    | filamin B, $\beta$                                                           | 1.97             | 2.20             | 1.41             | 1.57             |
| FLNC    | filamin C, $\gamma$                                                          | 1.47             | 1.85             | -1.58            | -1.26            |
| GNB1    | guanine nucleotide binding protein (G protein), $\beta$ polypeptide 1        | 1.86             | 3.62             | -1.06            | 1.83             |
| GNB2    | guanine nucleotide binding protein (G protein), $\beta$ polypeptide 2        | 1.98             | 3.27             | 1.01             | 1.67             |
| GNB3    | guanine nucleotide binding protein (G protein), $\beta$ polypeptide 3        | 2.59             | 4.64             | 1.20             | 2.15             |
| GNB4    | guanine nucleotide binding protein (G protein), $\beta$ polypeptide 4        | 2.76             | 4.71             | 1.25             | 2.13             |
| GNB2L1  | guanine nucleotide binding protein (G protein), $\beta$ polypeptide 2-like 1 | 2.39             | 3.54             | 1.01             | 1.49             |
| HIST3H3 | histone cluster 3, H3                                                        | 1.66             | 3.41             | -1.67            | 1.23             |
| HLA-B   | major histocompatibility complex, class I, B                                 | 1.64             | 2.53             | 1.69             | 2.60             |

| Symbol | Entrez Gene Name                                                                               | Fold Change (A1) | Fold Change (A2) | Fold Change (A3) | Fold Change (A4) |
|--------|------------------------------------------------------------------------------------------------|------------------|------------------|------------------|------------------|
| MYH10  | myosin, heavy chain 10, non-muscle                                                             | 1.68             | 2.52             | 1.41             | 2.11             |
| MYL1   | myosin, light chain 1, alkali; skeletal, fast                                                  | 1.72             | 2.81             | 1.03             | 1.68             |
| MYL6   | myosin, light chain 6, alkali, smooth muscle and non-muscle                                    | 1.46             | 2.42             | 1.02             | 1.68             |
| MYL12A | myosin, light chain 12A, regulatory, non-sarcomeric                                            | 1.94             | 2.05             | 1.38             | 1.45             |
| PDIA3  | protein disulfide isomerase family A, member 3                                                 | 1.61             | 2.41             | 1.02             | 1.53             |
| PPP1CB | protein phosphatase 1, catalytic subunit, $\beta$ isozyme                                      | 2.38             | 2.93             | 1.39             | 1.70             |
| PPP1CC | protein phosphatase 1, catalytic subunit, $\gamma$ isozyme                                     | 2.38             | 2.939            | 1.39             | 1.70             |
| PYGB   | phosphorylase, glycogen; brain                                                                 | 1.85             | 2.36             | 2.12             | 2.71             |
| PYGL   | phosphorylase, glycogen, liver                                                                 | 1.86             | 2.22             | 1.94             | 2.32             |
| PYGM   | phosphorylase, glycogen, muscle                                                                | 1.86             | 2.22             | 1.94             | 2.32             |
| RHOA   | ras homolog family member A                                                                    | 1.38             | 2.10             | 1.13             | 1.73             |
| TTN    | titin                                                                                          | 1.84             | 3.88             | 1.10             | 2.31             |
| YWHAB  | tyrosine 3-monooxygenase/tryptophan 5-monooxygenase activation protein, $\beta$ polypeptide    | 1.80             | 2.68             | 1.13             | 1.68             |
| YWHAE  | tyrosine 3-monooxygenase/tryptophan 5-monooxygenase activation protein, $\epsilon$ polypeptide | 1.88             | 3.85             | -1.04            | 1.97             |
| YWHAG  | tyrosine 3-monooxygenase/tryptophan 5-monooxygenase activation protein, $\gamma$ polypeptide   | 1.68             | 2.40             | -1.19            | 1.20             |
| YWHAQ  | tyrosine 3-monooxygenase/tryptophan 5-monooxygenase activation protein, $\theta$ polypeptide   | 1.63             | 2.14             | -1.07            | 1.22             |
| YWHAZ  | tyrosine 3-monooxygenase/tryptophan 5-monooxygenase activation protein, $\zeta$ polypeptide    | 1.85             | 2.76             | 1.23             | 1.84             |

**12. mTOR Signaling**

| <b>Symbol</b> | <b>Entrez Gene Name</b>                               | <b>Fold Change (A1)</b> | <b>Fold Change (A2)</b> | <b>Fold Change (A3)</b> | <b>Fold Change (A4)</b> |
|---------------|-------------------------------------------------------|-------------------------|-------------------------|-------------------------|-------------------------|
| EIF3L         | eukaryotic translation initiation factor 3, subunit L | 1.95                    | 1.68                    | 1.81                    | 1.56                    |
| EIF4A1        | eukaryotic translation initiation factor 4A1          | 1.80                    | 2.20                    | 1.37                    | 1.67                    |
| EIF4A2        | eukaryotic translation initiation factor 4A2          | 1.71                    | 2.07                    | 1.36                    | 1.64                    |
| EIF4G1        | eukaryotic translation initiation factor 4 gamma, 1   | 1.79                    | 2.52                    | 1.47                    | 2.07                    |
| EIF4G3        | eukaryotic translation initiation factor 4 gamma, 3   | 1.35                    | 2.24                    | 1.20                    | 1.99                    |
| PPP2R1A       | protein phosphatase 2, regulatory subunit A, alpha    | 1.54                    | 1.97                    | 1.37                    | 1.76                    |
| RHOA          | ras homolog family member A                           | 1.38                    | 2.10                    | 1.13                    | 1.73                    |
| RPS2          | ribosomal protein S2                                  | 1.54                    | 2.42                    | 1.16                    | 1.82                    |
| RPS3          | ribosomal protein S3                                  | 1.66                    | 2.40                    | 1.00                    | 1.45                    |
| RPS7          | ribosomal protein S7                                  | 1.51                    | 1.769                   | -1.07                   | 1.10                    |
| RPS9          | ribosomal protein S9                                  | 1.86                    | 3.48                    | 1.08                    | 2.01                    |
| RPS10         | ribosomal protein S10                                 | 2.31                    | 3.75                    | -1.13                   | 1.44                    |
| RPS11         | ribosomal protein S11                                 | 1.83                    | 3.01                    | -1.19                   | 1.38                    |
| RPS13         | ribosomal protein S13                                 | 2.40                    | 3.28                    | 1.27                    | 1.74                    |
| RPS16         | ribosomal protein S16                                 | 1.73                    | 3.35                    | -1.11                   | 1.74                    |
| RPS19         | ribosomal protein S19                                 | 1.35                    | 2.71                    | -1.33                   | 1.51                    |
| RPS24         | ribosomal protein S24                                 | 1.97                    | 2.36                    | 1.16                    | 1.39                    |
| RPS25         | ribosomal protein S25                                 | 1.82                    | 3.37                    | -1.34                   | 1.39                    |

| <b>Symbol</b> | <b>Entrez Gene Name</b>          | <b>Fold Change (A1)</b> | <b>Fold Change (A2)</b> | <b>Fold Change (A3)</b> | <b>Fold Change (A4)</b> |
|---------------|----------------------------------|-------------------------|-------------------------|-------------------------|-------------------------|
| RPS26         | ribosomal protein S26            | 1.81                    | 2.32                    | 1.10                    | 1.41                    |
| RPS15A        | ribosomal protein S15a           | 1.86                    | 2.41                    | 1.17                    | 1.52                    |
| RPS27L        | ribosomal protein S27-like       | 1.35                    | 2.39                    | -1.06                   | 1.67                    |
| RPS3A         | ribosomal protein S3A            | 1.55                    | 2.49                    | -1.11                   | 1.45                    |
| RPS4X         | ribosomal protein S4, X-linked   | 1.73                    | 2.67                    | -1.13                   | 1.36                    |
| RPS4Y1        | ribosomal protein S4, Y-linked 1 | 1.60                    | 2.77                    | -1.52                   | 1.14                    |
| RPSA          | ribosomal protein SA             | 1.46                    | 2.10                    | -1.28                   | 1.12                    |

### 13. Clathrin-mediated Endocytosis Signaling

| Symbol | Entrez Gene Name                                     | Fold Change (A1) | Fold Change (A2) | Fold Change (A3) | Fold Change (A4) |
|--------|------------------------------------------------------|------------------|------------------|------------------|------------------|
| ACTA1  | actin, alpha 1, skeletal muscle                      | 1.61             | 2.35             | 1.18             | 1.72             |
| ACTA2  | actin, alpha 2, smooth muscle, aorta                 | 1.64             | 2.34             | 1.23             | 1.76             |
| ACTB   | actin, beta                                          | 1.70             | 2.03             | 1.28             | 1.53             |
| ACTC1  | actin, alpha, cardiac muscle 1                       | 1.42             | 1.83             | 1.17             | 1.52             |
| ACTR2  | ARP2 actin-related protein 2 homolog (yeast)         | 1.66             | 1.75             | 1.30             | 1.37             |
| ACTR3  | ARP3 actin-related protein 3 homolog (yeast)         | 1.87             | 2.51             | 1.36             | 1.83             |
| AP2A1  | adaptor-related protein complex 2, alpha 1 subunit   | 1.87             | 2.07             | 1.49             | 1.65             |
| AP2A2  | adaptor-related protein complex 2, alpha 2 subunit   | 1.91             | 2.00             | 1.40             | 1.47             |
| AP2B1  | adaptor-related protein complex 2, beta 1 subunit    | 1.76             | 2.14             | 1.68             | 2.05             |
| ARPC2  | actin related protein 2/3 complex, subunit 2, 34kDa  | 2.05             | 3.40             | 1.28             | 2.13             |
| ARPC3  | actin related protein 2/3 complex, subunit 3, 21kDa  | 1.86             | 2.77             | 1.36             | 2.03             |
| ARPC4  | actin related protein 2/3 complex, subunit 4, 20kDa  | 2.36             | 3.40             | 1.60             | 2.31             |
| ARPC5  | actin related protein 2/3 complex, subunit 5, 16kDa  | 1.59             | 2.95             | 1.00             | 1.87             |
| ARPC1B | actin related protein 2/3 complex, subunit 1B, 41kDa | 1.90             | 2.74             | 1.07             | 1.54             |
| CLTCL1 | clathrin, heavy chain-like 1                         | 1.35             | 1.89             | 1.65             | 2.31             |
| CTTN   | cortactin                                            | 1.71             | 3.57             | 1.00             | 2.08             |

| <b>Symbol</b> | <b>Entrez Gene Name</b>                                                                      | <b>Fold Change (A1)</b> | <b>Fold Change (A2)</b> | <b>Fold Change (A3)</b> | <b>Fold Change (A4)</b> |
|---------------|----------------------------------------------------------------------------------------------|-------------------------|-------------------------|-------------------------|-------------------------|
| DAB2          | disabled homolog 2, mitogen-responsive phosphoprotein (Drosophila)                           | 1.57                    | 2.01                    | 2.18                    | 2.79                    |
| HSPA8         | heat shock 70kDa protein 8                                                                   | 1.65                    | 2.34                    | -1.06                   | 1.33                    |
| ITGB1         | integrin, beta 1 (fibronectin receptor, beta polypeptide, antigen CD29 includes MDF2, MSK12) | 1.50                    | 2.41                    | -1.24                   | 1.29                    |
| ITGB3         | integrin, beta 3 (platelet glycoprotein IIIa, antigen CD61)                                  | 1.46                    | 3.13                    | -1.57                   | 1.36                    |
| RAB7A         | RAB7A, member RAS oncogene family                                                            | 1.90                    | 2.64                    | 1.45                    | 2.02                    |

**14. Caveolar-mediated Endocytosis Signaling**

| <b>Symbol</b> | <b>Entrez Gene Name</b>                                                                      | <b>Fold Change (A1)</b> | <b>Fold Change (A2)</b> | <b>Fold Change (A3)</b> | <b>Fold Change (A4)</b> |
|---------------|----------------------------------------------------------------------------------------------|-------------------------|-------------------------|-------------------------|-------------------------|
| ACTA1         | actin, alpha 1, skeletal muscle                                                              | 1.61                    | 2.35                    | 1.18                    | 1.72                    |
| ACTA2         | actin, alpha 2, smooth muscle, aorta                                                         | 1.64                    | 2.34                    | 1.23                    | 1.76                    |
| ACTB          | actin, beta                                                                                  | 1.70                    | 2.03                    | 1.28                    | 1.53                    |
| ACTC1         | actin, alpha, cardiac muscle 1                                                               | 1.42                    | 1.83                    | 1.17                    | 1.52                    |
| ARCN1         | archain 1                                                                                    | 1.58                    | 2.07                    | 1.18                    | 1.54                    |
| COPB1         | coatamer protein complex, subunit beta 1                                                     | 1.51                    | 2.10                    | 1.37                    | 1.91                    |
| FLNA          | filamin A, alpha                                                                             | 1.57                    | 2.04                    | 1.49                    | 1.94                    |
| FLNB          | filamin B, beta                                                                              | 1.97                    | 2.20                    | 1.41                    | 1.58                    |
| FLNC          | filamin C, gamma                                                                             | 1.47                    | 1.85                    | -1.58                   | -1.26                   |
| HLA-B         | major histocompatibility complex, class I, B                                                 | 1.64                    | 2.53                    | 1.69                    | 2.60                    |
| ITGB1         | integrin, beta 1 (fibronectin receptor, beta polypeptide, antigen CD29 includes MDF2, MSK12) | 1.50                    | 2.41                    | -1.24                   | 1.29                    |
| ITGB3         | integrin, beta 3 (platelet glycoprotein IIIa, antigen CD61)                                  | 1.46                    | 3.13                    | -1.57                   | 1.36                    |

**15. Calcium Signaling**

| <b>Symbol</b> | <b>Entrez Gene Name</b>                              | <b>Fold Change (A1)</b> | <b>Fold Change (A2)</b> | <b>Fold Change (A3)</b> | <b>Fold Change (A4)</b> |
|---------------|------------------------------------------------------|-------------------------|-------------------------|-------------------------|-------------------------|
| ACTA1         | actin, alpha 1, skeletal muscle                      | 1.61                    | 2.35                    | 1.18                    | 1.72                    |
| ACTA2         | actin, alpha 2, smooth muscle, aorta                 | 1.64                    | 2.34                    | 1.23                    | 1.76                    |
| ACTC1         | actin, alpha, cardiac muscle 1                       | 1.42                    | 1.83                    | 1.17                    | 1.52                    |
| CALR          | calreticulin                                         | 2.02                    | 2.29                    | 1.01                    | 1.15                    |
| CAMK2A        | calcium/calmodulin-dependent protein kinase II alpha | 1.71                    | 1.90                    | 1.54                    | 1.71                    |
| CAMK2B        | calcium/calmodulin-dependent protein kinase II beta  | 1.63                    | 2.03                    | 1.38                    | 1.71                    |
| CAMK2D        | calcium/calmodulin-dependent protein kinase II delta | 1.72                    | 2.22                    | 1.42                    | 1.83                    |
| CAMK2G        | calcium/calmodulin-dependent protein kinase II gamma | 1.63                    | 2.03                    | 1.38                    | 1.71                    |
| MYH9          | myosin, heavy chain 9, non-muscle                    | 1.53                    | 1.99                    | 1.24                    | 1.62                    |
| MYH10         | myosin, heavy chain 10, non-muscle                   | 1.68                    | 2.52                    | 1.41                    | 2.11                    |
| MYH11         | myosin, heavy chain 11, smooth muscle                | 1.73                    | 2.62                    | 1.32                    | 1.99                    |
| MYH14         | myosin, heavy chain 14, non-muscle                   | 2.06                    | 3.03                    | 1.42                    | 2.09                    |
| MYL1          | myosin, light chain 1, alkali; skeletal, fast        | 1.72                    | 2.81                    | 1.03                    | 1.68                    |



| <b>Symbol</b>                  | <b>Entrez Gene Name</b>                                     | <b>Fold Change (A1)</b> | <b>Fold Change (A2)</b> | <b>Fold Change (A3)</b> | <b>Fold Change (A4)</b> |
|--------------------------------|-------------------------------------------------------------|-------------------------|-------------------------|-------------------------|-------------------------|
| MYL6                           | myosin, light chain 6, alkali, smooth muscle and non-muscle | 1.46                    | 2.42                    | 1.02                    | 1.68                    |
| TPM2                           | tropomyosin 2 (beta)                                        | 1.77                    | 1.64                    | 1.41                    | 1.30                    |
| TPM3                           | tropomyosin 3                                               | 1.73                    | 1.53                    | 1.39                    | 1.24                    |
| TPM4                           | tropomyosin 4                                               | 1.68                    | 1.66                    |                         | 1.18                    |
| TPM1<br>(includes<br>EG:22003) | tropomyosin 1 (alpha)                                       | 1.75                    | 1.56                    | 1.32                    | 1.18                    |

**16. Pentose Phosphate Pathway**

| <b>Symbol</b> | <b>Entrez Gene Name</b>                          | <b>Fold Change (A1)</b> | <b>Fold Change (A2)</b> | <b>Fold Change (A3)</b> | <b>Fold Change (A4)</b> |
|---------------|--------------------------------------------------|-------------------------|-------------------------|-------------------------|-------------------------|
| ALDOA         | aldolase A, fructose-bisphosphate                | 1.45                    | 1.99                    | -1.16                   | 1.19                    |
| G6PD          | glucose-6-phosphate dehydrogenase                | 1.59                    | 2.56                    | 1.00                    | 1.61                    |
| GPI           | glucose-6-phosphate isomerase                    | 1.57                    | 1.98                    | 1.31                    | 1.66                    |
| PFKL          | phosphofructokinase, liver                       | 1.74                    | 2.37                    | 1.17                    | 1.60                    |
| PGLS          | 6-phosphogluconolactonase                        | 1.38                    | 1.90                    | 1.41                    | 1.94                    |
| PGM1          | phosphoglucomutase 1                             | 2.09                    | 1.92                    | 1.97                    | 1.81                    |
| PRPS1         | phosphoribosyl pyrophosphate synthetase 1        | 1.80                    | 2.44                    | 1.17                    | 1.58                    |
| PRPS1L1       | phosphoribosyl pyrophosphate synthetase 1-like 1 | 1.63                    | 2.13                    | 1.17                    | 1.53                    |
| TALDO1        | transaldolase 1                                  | 1.55                    | 2.21                    | 1.39                    | 1.98                    |
| TKT           | transketolase                                    | 1.52                    | 1.67                    | 1.33                    | 1.46                    |

## 17. Cdc42 Signaling

| Symbol | Entrez Gene Name                                                                             | Fold Change (A1) | Fold Change (A2) | Fold Change (A3) | Fold Change (A4) |
|--------|----------------------------------------------------------------------------------------------|------------------|------------------|------------------|------------------|
| ACTR2  | ARP2 actin-related protein 2 homolog (yeast)                                                 | 1.66             | 1.75             | 1.30             | 1.37             |
| ACTR3  | ARP3 actin-related protein 3 homolog (yeast)                                                 | 1.87             | 2.51             | 1.36             | 1.83             |
| ARPC2  | actin related protein 2/3 complex, subunit 2, 34kDa                                          | 2.05             | 3.40             | 1.28             | 2.13             |
| ARPC3  | actin related protein 2/3 complex, subunit 3, 21kDa                                          | 1.86             | 2.77             | 1.36             | 2.03             |
| ARPC4  | actin related protein 2/3 complex, subunit 4, 20kDa                                          | 2.36             | 3.40             | 1.60             | 2.31             |
| ARPC5  | actin related protein 2/3 complex, subunit 5, 16kDa                                          | 1.59             | 2.95             | 1.00             | 1.87             |
| ARPC1B | actin related protein 2/3 complex, subunit 1B, 41kDa                                         | 1.90             | 2.74             | 1.07             | 1.54             |
| CFL1   | cofilin 1 (non-muscle)                                                                       | 1.48             | 2.03             | -1.29            | 1.06             |
| CFL2   | cofilin 2 (muscle)                                                                           | 1.34             | 1.95             | -1.21            | 1.20             |
| HLA-B  | major histocompatibility complex, class I, B                                                 | 1.64             | 2.53             | 1.69             | 2.60             |
| IQGAP1 | IQ motif containing GTPase activating protein 1                                              | 1.64             | 2.22             | 1.41             | 1.91             |
| ITGB1  | integrin, beta 1 (fibronectin receptor, beta polypeptide, antigen CD29 includes MDF2, MSK12) | 1.50             | 2.41             | -1.24            | 1.29             |
| MYL1   | myosin, light chain 1, alkali; skeletal, fast                                                | 1.72             | 2.81             | 1.03             | 1.68             |
| MYL6   | myosin, light chain 6, alkali, smooth muscle and non-muscle                                  | 1.46             | 2.42             | 1.02             | 1.68             |
| MYL12A | myosin, light chain 12A, regulatory, non-sarcomeric                                          | 1.94             | 2.05             | 1.386            | 1.45             |

| Symbol | Entrez Gene Name                                       | Fold Change (A1) | Fold Change (A2) | Fold Change (A3) | Fold Change (A4) |
|--------|--------------------------------------------------------|------------------|------------------|------------------|------------------|
| PPP1CB | protein phosphatase 1, catalytic subunit, beta isozyme | 2.38             | 2.93             | 1.39             | 1.70             |

## 18. Ephrin Receptor Signaling

| Symbol | Entrez Gene Name                                                   | Fold Change (A1) | Fold Change (A2) | Fold Change (A3) | Fold Change (A4) |
|--------|--------------------------------------------------------------------|------------------|------------------|------------------|------------------|
| ACTR2  | ARP2 actin-related protein 2 homolog (yeast)                       | 1.66             | 1.75             | 1.30             | 1.37             |
| ACTR3  | ARP3 actin-related protein 3 homolog (yeast)                       | 1.87             | 2.51             | 1.36             | 1.83             |
| ARPC2  | actin related protein 2/3 complex, subunit 2, 34kDa                | 2.05             | 3.40             | 1.28             | 2.13             |
| ARPC3  | actin related protein 2/3 complex, subunit 3, 21kDa                | 1.86             | 2.77             | 1.36             | 2.03             |
| ARPC4  | actin related protein 2/3 complex, subunit 4, 20kDa                | 2.36             | 3.40             | 1.60             | 2.31             |
| ARPC5  | actin related protein 2/3 complex, subunit 5, 16kDa                | 1.59             | 2.95             | 1.00             | 1.87             |
| ARPC1B | actin related protein 2/3 complex, subunit 1B, 41kDa               | 1.90             | 2.74             | 1.07             | 1.54             |
| CFL1   | cofilin 1 (non-muscle)                                             | 1.48             | 2.03             | -1.29            | 1.06             |
| CFL2   | cofilin 2 (muscle)                                                 | 1.34             | 1.95             | -1.21            | 1.20             |
| GNB1   | guanine nucleotide binding protein (G protein), beta polypeptide 1 | 1.86             | 3.62             | -1.06            | 1.83             |
| GNB2   | guanine nucleotide binding protein (G protein), beta polypeptide 2 | 1.98             | 3.27             | 1.01             | 1.67             |

| <b>Symbol</b> | <b>Entrez Gene Name</b>                                                                      | <b>Fold Change (A1)</b> | <b>Fold Change (A2)</b> | <b>Fold Change (A3)</b> | <b>Fold Change (A4)</b> |
|---------------|----------------------------------------------------------------------------------------------|-------------------------|-------------------------|-------------------------|-------------------------|
| GNB3          | guanine nucleotide binding protein (G protein), beta polypeptide 3                           | 2.59                    | 4.64                    | 1.20                    | 2.15                    |
| GNB4          | guanine nucleotide binding protein (G protein), beta polypeptide 4                           | 2.76                    | 4.71                    | 1.25                    | 2.13                    |
| GNB2L1        | guanine nucleotide binding protein (G protein), beta polypeptide 2-like 1                    | 2.39                    | 3.54                    | 1.01                    | 1.49                    |
| ITGB1         | integrin, beta 1 (fibronectin receptor, beta polypeptide, antigen CD29 includes MDF2, MSK12) | 1.50                    | 2.41                    | -1.24                   | 1.29                    |
| RHOA          | ras homolog family member A                                                                  | 1.38                    | 2.10                    | 1.13                    | 1.73                    |

**19. Rac Signaling**

| <b>Symbol</b> | <b>Entrez Gene Name</b>                                                                      | <b>Fold Change (A1)</b> | <b>Fold Change (A2)</b> | <b>Fold Change (A3)</b> | <b>Fold Change (A4)</b> |
|---------------|----------------------------------------------------------------------------------------------|-------------------------|-------------------------|-------------------------|-------------------------|
| ACTR2         | ARP2 actin-related protein 2 homolog (yeast)                                                 | 1.66                    | 1.75                    | 1.30                    | 1.37                    |
| ACTR3         | ARP3 actin-related protein 3 homolog (yeast)                                                 | 1.87                    | 2.51                    | 1.36                    | 1.83                    |
| ARPC2         | actin related protein 2/3 complex, subunit 2, 34kDa                                          | 2.05                    | 3.40                    | 1.28                    | 2.13                    |
| ARPC3         | actin related protein 2/3 complex, subunit 3, 21kDa                                          | 1.86                    | 2.77                    | 1.36                    | 2.03                    |
| ARPC4         | actin related protein 2/3 complex, subunit 4, 20kDa                                          | 2.36                    | 3.40                    | 1.60                    | 2.31                    |
| ARPC5         | actin related protein 2/3 complex, subunit 5, 16kDa                                          | 1.56                    | 2.95                    | 1.00                    | 1.87                    |
| ARPC1B        | actin related protein 2/3 complex, subunit 1B, 41kDa                                         | 1.90                    | 2.74                    | 1.07                    | 1.54                    |
| CFL1          | cofilin 1 (non-muscle)                                                                       | 1.48                    | 2.03                    | -1.29                   | 1.06                    |
| CFL2          | cofilin 2 (muscle)                                                                           | 1.34                    | 1.95                    | -1.21                   | 1.20                    |
| IQGAP1        | IQ motif containing GTPase activating protein 1                                              | 1.64                    | 2.22                    | 1.41                    | 1.91                    |
| ITGB1         | integrin, beta 1 (fibronectin receptor, beta polypeptide, antigen CD29 includes MDF2, MSK12) | 1.50                    | 2.41                    | -1.24                   | 1.29                    |
| RHOA          | ras homolog family member A                                                                  | 1.38                    | 2.10                    | 1.13                    | 1.73                    |

**20. Cellular Effects of Sildenafil (Viagra)**

| <b>Symbol</b> | <b>Entrez Gene Name</b>                                     | <b>Fold Change (A1#)</b> | <b>Fold Change (A2)</b> | <b>Fold Change (A3)</b> | <b>Fold Change (A4)</b> |
|---------------|-------------------------------------------------------------|--------------------------|-------------------------|-------------------------|-------------------------|
| ACTA1         | actin, alpha 1, skeletal muscle                             | 1.61                     | 2.35                    | 1.18                    | 1.72                    |
| ACTA2         | actin, alpha 2, smooth muscle, aorta                        | 1.64                     | 2.34                    | 1.23                    | 1.76                    |
| ACTB          | actin, beta                                                 | 1.70                     | 2.03                    | 1.28                    | 1.53                    |
| ACTC1         | actin, alpha, cardiac muscle 1                              | 1.42                     | 1.83                    | 1.17                    | 1.52                    |
| MYH9          | myosin, heavy chain 9, non-muscle                           | 1.53                     | 1.99                    | 1.24                    | 1.62                    |
| MYH10         | myosin, heavy chain 10, non-muscle                          | 1.68                     | 2.52                    | 1.41                    | 2.11                    |
| MYH11         | myosin, heavy chain 11, smooth muscle                       | 1.73                     | 2.62                    | 1.32                    | 1.99                    |
| MYH14         | myosin, heavy chain 14, non-muscle                          | 2.06                     | 3.03                    | 1.42                    | 2.09                    |
| MYL1          | myosin, light chain 1, alkali; skeletal, fast               | 1.72                     | 2.81                    | 1.03                    | 1.68                    |
| MYL6          | myosin, light chain 6, alkali, smooth muscle and non-muscle | 1.46                     | 2.42                    | 1.02                    | 1.68                    |
| MYL12A        | myosin, light chain 12A, regulatory, non-sarcomeric         | 1.94                     | 2.05                    | 1.38                    | 1.45                    |
| PABPC4        | poly(A) binding protein, cytoplasmic 4 (inducible form)     | 1.63                     | 2.12                    | 1.03                    | 1.34                    |
| PDIA3         | protein disulfide isomerase family A, member 3              | 1.61                     | 2.41                    | 1.02                    | 1.53                    |
| PPP1CB        | protein phosphatase 1, catalytic subunit, beta isozyme      | 2.38                     | 2.93                    | 1.39                    | 1.70                    |

**21. FAK (Focal Adhesion Kinase) Signaling**

| <b>Symbol</b> | <b>Entrez Gene Name</b>                                                                      | <b>Fold Change (A1)</b> | <b>Fold Change (A2)</b> | <b>Fold Change (A3)</b> | <b>Fold Change (A4)</b> |
|---------------|----------------------------------------------------------------------------------------------|-------------------------|-------------------------|-------------------------|-------------------------|
| ACTA1         | actin, alpha 1, skeletal muscle                                                              | 1.61                    | 2.35                    | 1.18                    | 1.72                    |
| ACTA2         | actin, alpha 2, smooth muscle, aorta                                                         | 1.64                    | 2.34                    | 1.23                    | 1.76                    |
| ACTB          | actin, beta                                                                                  | 1.70                    | 2.03                    | 1.28                    | 1.53                    |
| ACTC1         | actin, alpha, cardiac muscle 1                                                               | 1.42                    | 1.83                    | 1.17                    | 1.52                    |
| CAPN2         | calpain 2, (m/II) large subunit                                                              | 1.37                    | 1.93                    | 1.83                    | 2.58                    |
| CAPNS1        | calpain, small subunit 1                                                                     | 1.51                    | 2.07                    | 1.36                    | 1.86                    |
| ITGB1         | integrin, beta 1 (fibronectin receptor, beta polypeptide, antigen CD29 includes MDF2, MSK12) | 1.50                    | 2.41                    | -1.24                   | 1.29                    |
| TLN1          | talin 1                                                                                      | 1.54                    | 2.28                    | 1.02                    | 1.52                    |
| TLN2          | talin 2                                                                                      | 1.44                    | 2.61                    | -1.02                   | 1.78                    |
| VCL           | vinculin                                                                                     | 1.67                    | 2.05                    | 1.17                    | 1.43                    |



**22. VEGF (Vascular Endothelial Growth Factor) Signaling.**

| <b>Symbol</b> | <b>Entrez Gene Name</b>                                                                               | <b>Fold Change (A1)</b> | <b>Fold Change (A2)</b> | <b>Fold Change (A3)</b> | <b>Fold Change (A4)</b> |
|---------------|-------------------------------------------------------------------------------------------------------|-------------------------|-------------------------|-------------------------|-------------------------|
| ACTA1         | actin, alpha 1, skeletal muscle                                                                       | 1.61                    | 2.35                    | 1.186                   | 1.72                    |
| ACTA2         | actin, alpha 2, smooth muscle, aorta                                                                  | 1.64                    | 2.34                    | 1.23                    | 1.76                    |
| ACTB          | actin, beta                                                                                           | 1.70                    | 2.03                    | 1.28                    | 1.53                    |
| ACTC1         | actin, alpha, cardiac muscle 1                                                                        | 1.42                    | 1.83                    | 1.17                    | 1.52                    |
| ACTN1         | actinin, alpha 1                                                                                      | 1.64                    | 2.05                    | 1.41                    | 1.76                    |
| ACTN2         | actinin, alpha 2                                                                                      | 1.55                    | 2.30                    | 1.17                    | 1.73                    |
| ACTN3         | actinin, alpha 3                                                                                      | 1.74                    | 2.52                    | 1.36                    | 1.98                    |
| ACTN4         | actinin, alpha 4                                                                                      | 1.65                    | 2.10                    | 1.30                    | 1.65                    |
| VCL           | vinculin                                                                                              | 1.67                    | 2.05                    | 1.17                    | 1.43                    |
| YWHAE         | tyrosine 3-monooxygenase/<br>tryptophan 5-monooxygenase<br>activation protein, epsilon<br>polypeptide | 1.88                    | 3.85                    | -1.04                   | 1.97                    |

**Supplementary Table 3.** Meta data for Figure 5 and supplementary Figure 1. Differentially expressed proteins related to protein synthesis in the four comparisons. Fold changes in four comparisons: A1: ET-1 treated vs. basal in CONTROL PASMIC; A2. ET-1 treated vs. basal in PAH PASMIC; A3. PAH cells vs. CONTROL cells under basal condition; A4. PAH vs. Control cells, both with ET-1 stimulation.

| Symbol | Entrez Gene Name                                        | Fold Change (A1) | Fold Change (A2) | Fold Change (A3) | Fold Change (A4) |
|--------|---------------------------------------------------------|------------------|------------------|------------------|------------------|
| EIF3L  | eukaryotic translation initiation factor 3, subunit L   | 1.95             | 1.68             | 1.81             | 1.56             |
| EIF4A1 | eukaryotic translation initiation factor 4A1            | 1.80             | 2.20             | 1.37             | 1.67             |
| EIF4A2 | eukaryotic translation initiation factor 4A2            | 1.71             | 2.07             | 1.36             | 1.64             |
| EIF4G1 | eukaryotic translation initiation factor 4 gamma, 1     | 1.79             | 2.52             | 1.47             | 2.07             |
| EIF4G3 | eukaryotic translation initiation factor 4 gamma, 3     | 1.35             | 2.24             | 1.20             | 1.99             |
| PABPC1 | poly(A) binding protein, cytoplasmic 1                  | 1.68             | 2.22             | 1.03             | 1.37             |
| PPP1CB | protein phosphatase 1, catalytic subunit, beta isozyme  | 2.38             | 2.93             | 1.39             | 1.70             |
| PPP1CC | protein phosphatase 1, catalytic subunit, gamma isozyme | 2.38             | 2.93             | 1.39             | 1.70             |
| RPL4   | ribosomal protein L4                                    | 2.56             | 3.01             | 1.51             | 1.78             |
| RPL5   | ribosomal protein L5                                    | 1.50             | 2.73             | -1.42            | 1.29             |
| RPL7   | ribosomal protein L7                                    | 1.38             | 1.60             | -1.02            | 1.14             |
| RPL8   | ribosomal protein L8                                    | 1.68             | 3.06             | -1.25            | 1.47             |
| RPL9   | ribosomal protein L9                                    | 1.99             | 2.49             | 1.09             | 1.36             |
| RPL13  | ribosomal protein L13                                   | 1.44             | 2.33             | -1.21            | 1.33             |
| RPL14  | ribosomal protein L14                                   | 1.92             | 2.25             | 1.37             | 1.61             |
| RPL15  | ribosomal protein L15                                   | 1.41             | 2.80             | -1.23            | 1.61             |

| <b>Symbol</b>              | <b>Entrez Gene Name</b>      | <b>Fold Change (A1)</b> | <b>Fold Change (A2)</b> | <b>Fold Change (A3)</b> | <b>Fold Change (A4)</b> |
|----------------------------|------------------------------|-------------------------|-------------------------|-------------------------|-------------------------|
| RPL19                      | ribosomal protein L19        | 1.50                    | 3.47                    | -1.21                   | 1.91                    |
| RPL21                      | ribosomal protein L21        | 1.68                    | 2.26                    | -1.08                   | 1.25                    |
| RPL22                      | ribosomal protein L22        | 1.36                    | 2.86                    | -1.41                   | 1.50                    |
| RPL24                      | ribosomal protein L24        | 1.60                    | 2.03                    | 1.13                    | 1.44                    |
| RPL30                      | ribosomal protein L30        | 1.68                    | 2.55                    | -1.07                   | 1.42                    |
| RPL10<br>(includes others) | ribosomal protein L10        | 1.63                    | 2.16                    | -1.02                   | 1.30                    |
| RPL13A                     | ribosomal protein L13a       | 1.70                    | 3.35                    | -1.34                   | 1.48                    |
| RPL18A                     | ribosomal protein L18a       | 1.83                    | 2.45                    | -1.05                   | 1.27                    |
| RPL23A                     | ribosomal protein L23a       | 1.71                    | 2.97                    | -1.13                   | 1.53                    |
| RPL35A                     | ribosomal protein L35a       | 1.35                    | 2.33                    | -1.29                   | 1.34                    |
| RPL7A                      | ribosomal protein L7a        | 1.54                    | 2.16                    | -1.12                   | 1.25                    |
| RPLP0                      | ribosomal protein, large, P0 | 2.23                    | 3.23                    | 1.17                    | 1.60                    |
| RPLP2                      | ribosomal protein, large, P2 | 2.28                    | 2.72                    | 1.28                    | 1.53                    |
| RPS2                       | ribosomal protein S2         | 1.54                    | 2.42                    | 1.16                    | 1.82                    |
| RPS3                       | ribosomal protein S3         | 1.66                    | 2.40                    | 1.00                    | 1.45                    |
| RPS7                       | ribosomal protein S7         | 1.51                    | 1.76                    | -1.07                   | 1.10                    |
| RPS9                       | ribosomal protein S9         | 1.86                    | 3.48                    | 1.08                    | 2.01                    |
| RPS10                      | ribosomal protein S10        | 2.31                    | 3.75                    | -1.13                   | 1.44                    |
| RPS11                      | ribosomal protein S11        | 1.83                    | 3.01                    | -1.19                   | 1.38                    |
| RPS13                      | ribosomal protein S13        | 2.40                    | 3.28                    | 1.27                    | 1.74                    |
| RPS16                      | ribosomal protein S16        | 1.73                    | 3.35                    | -1.11                   | 1.74                    |
| RPS19                      | ribosomal protein S19        | 1.35                    | 2.71                    | -1.33                   | 1.51                    |
| RPS24                      | ribosomal protein S24        | 1.97                    | 2.36                    | 1.16                    | 1.39                    |
| RPS25                      | ribosomal protein S25        | 1.82                    | 3.37                    | -1.34                   | 1.39                    |

| <b>Symbol</b> | <b>Entrez Gene Name</b>                                                                      | <b>Fold Change (A1)</b> | <b>Fold Change (A2)</b> | <b>Fold Change (A3)</b> | <b>Fold Change (A4)</b> |
|---------------|----------------------------------------------------------------------------------------------|-------------------------|-------------------------|-------------------------|-------------------------|
| RPS26         | ribosomal protein S26                                                                        | 1.81                    | 2.32                    | 1.10                    | 1.41                    |
| RPS15A        | ribosomal protein S15a                                                                       | 1.86                    | 2.41                    | 1.17                    | 1.52                    |
| RPS27L        | ribosomal protein S27-like                                                                   | 1.35                    | 2.39                    | -1.06                   | 1.67                    |
| RPS3A         | ribosomal protein S3A                                                                        | 1.55                    | 2.49                    | -1.11                   | 1.45                    |
| RPS4X         | ribosomal protein S4, X-linked                                                               | 1.73                    | 2.67                    | -1.13                   | 1.36                    |
| RPS4Y1        | ribosomal protein S4, Y-linked 1                                                             | 1.60                    | 2.77                    | -1.52                   | 1.14                    |
| RPSA          | ribosomal protein SA                                                                         | 1.46                    | 2.10                    | -1.28                   | 1.12                    |
| ITGB1         | integrin, beta 1 (fibronectin receptor, beta polypeptide, antigen CD29 includes MDF2, MSK12) | 1.50                    | 2.41                    | -1.24                   | 1.29                    |
| PPP2R1A       | protein phosphatase 2, regulatory subunit A, alpha                                           | 1.54                    | 1.97                    | 1.37                    | 1.76                    |
| RHOA          | ras homolog family member A                                                                  | 1.38                    | 2.10                    | 1.13                    | 1.73                    |

**Supplementary Table 4.** Meta data for Figure 6 and supplementary Figure 2. Differentially expressed proteins related to RhoA and cytoskeleton in the four comparisons. Fold changes in four comparisons: A1: ET-1 treated vs. basal in Control PASM; A2. ET-1 treated vs. basal in PAH PASM; A3. PAH cells vs. Control cells under basal condition; A4. PAH vs. Control cells, both with ET-1 stimulation.

| <b>Symbol</b> | <b>Entrez Gene Name</b>                              | <b>Fold Change (A1)</b> | <b>Fold Change (A2)</b> | <b>Fold Change (A3)</b> | <b>Fold Change (A4)</b> |
|---------------|------------------------------------------------------|-------------------------|-------------------------|-------------------------|-------------------------|
| ACTA1         | actin, alpha 1, skeletal muscle                      | 1.61                    | 2.35                    | 1.18                    | 1.72                    |
| ACTA2         | actin, alpha 2, smooth muscle, aorta                 | 1.64                    | 2.34                    | 1.23                    | 1.76                    |
| ACTB          | actin, beta                                          | 1.70                    | 2.03                    | 1.28                    | 1.53                    |
| ACTC1         | actin, alpha, cardiac muscle 1                       | 1.42                    | 1.83                    | 1.17                    | 1.52                    |
| ACTR2         | ARP2 actin-related protein 2 homolog (yeast)         | 1.66                    | 1.75                    | 1.30                    | 1.37                    |
| ACTR3         | ARP3 actin-related protein 3 homolog (yeast)         | 1.87                    | 2.51                    | 1.36                    | 1.83                    |
| ARHGAP1       | Rho GTPase activating protein 1                      | 1.41                    | 1.75                    | 1.53                    | 1.90                    |
| ARPC2         | actin related protein 2/3 complex, subunit 2, 34kDa  | 2.05                    | 3.40                    | 1.28                    | 2.13                    |
| ARPC3         | actin related protein 2/3 complex, subunit 3, 21kDa  | 1.86                    | 2.77                    | 1.36                    | 2.03                    |
| ARPC4         | actin related protein 2/3 complex, subunit 4, 20kDa  | 2.36                    | 3.40                    | 1.60                    | 2.31                    |
| ARPC5         | actin related protein 2/3 complex, subunit 5, 16kDa  | 1.59                    | 2.95                    | 1.00                    | 1.87                    |
| ARPC1B        | actin related protein 2/3 complex, subunit 1B, 41kDa | 1.90                    | 2.74                    | 1.07                    | 1.54                    |
| CFL1          | cofilin 1 (non-muscle)                               | 1.48                    | 2.03                    | -1.29                   | 1.06                    |
| CFL2          | cofilin 2 (muscle)                                   | 1.34                    | 1.95                    | -1.21                   | 1.20                    |
| EZR           | ezrin                                                | 1.75                    | 2.04                    | 1.66                    | 1.94                    |
| MSN           | moesin                                               | 1.87                    | 2.31                    | 1.51                    | 1.87                    |

| Symbol | Entrez Gene Name                                                                             | Fold Change (A1) | Fold Change (A2) | Fold Change (A3) | Fold Change (A4) |
|--------|----------------------------------------------------------------------------------------------|------------------|------------------|------------------|------------------|
| MYL1   | myosin, light chain 1, alkali; skeletal, fast                                                | 1.72             | 2.81             | 1.03             | 1.68             |
| MYL6   | myosin, light chain 6, alkali, smooth muscle and non-muscle                                  | 1.46             | 2.42             | 1.02             | 1.68             |
| MYL12A | myosin, light chain 12A, regulatory, non-sarcomeric                                          | 1.94             | 2.05             | 1.38             | 1.45             |
| PFN1   | profilin 1                                                                                   | 1.72             | 2.40             | 1.30             | 1.82             |
| PPP1CB | protein phosphatase 1, catalytic subunit, beta isozyme                                       | 2.38             | 2.93             | 1.39             | 1.70             |
| RDX    | radixin                                                                                      | 1.79             | 2.14             | 1.60             | 1.91             |
| RHOA   | ras homolog family member A                                                                  | 1.38             | 2.10             | 1.13             | 1.73             |
| SEPT2  | septin 2                                                                                     | 1.72             | 1.95             | 1.17             | 1.32             |
| SEPT6  | septin 6                                                                                     | 1.88             | 2.62             | 1.12             | 1.56             |
| SEPT7  | septin 7                                                                                     | 1.78             | 2.58             | 1.08             | 1.57             |
| SEPT8  | septin 8                                                                                     | 1.88             | 2.62             | 1.12             | 1.56             |
| TTN    | titin                                                                                        | 1.84             | 3.88             | 1.10             | 2.31             |
| ACTN1  | actinin, alpha 1                                                                             | 1.64             | 2.05             | 1.41             | 1.76             |
| ACTN2  | actinin, alpha 2                                                                             | 1.55             | 2.30             | 1.17             | 1.73             |
| ACTN3  | actinin, alpha 3                                                                             | 1.74             | 2.52             | 1.36             | 1.98             |
| ACTN4  | actinin, alpha 4                                                                             | 1.65             | 2.10             | 1.30             | 1.65             |
| FN1    | fibronectin 1                                                                                | 1.42             | 1.94             | -1.18            | 1.16             |
| GSN    | gelsolin                                                                                     | 1.70             | 2.28             | 1.33             | 1.78             |
| IQGAP1 | IQ motif containing GTPase activating protein 1                                              | 1.64             | 2.22             | 1.41             | 1.91             |
| ITGB1  | integrin, beta 1 (fibronectin receptor, beta polypeptide, antigen CD29 includes MDF2, MSK12) | 1.50             | 2.41             | -1.24            | 1.29             |
| MYH9   | myosin, heavy chain 9, non-                                                                  | 1.53             | 1.99             | 1.24             | 1.62             |

| <b>Symbol</b> | <b>Entrez Gene Name</b>                                     | <b>Fold Change (A1)</b> | <b>Fold Change (A2)</b> | <b>Fold Change (A3)</b> | <b>Fold Change (A4)</b> |
|---------------|-------------------------------------------------------------|-------------------------|-------------------------|-------------------------|-------------------------|
|               | muscle                                                      |                         |                         |                         |                         |
| MYH10         | myosin, heavy chain 10, non-muscle                          | 1.68                    | 2.52                    | 1.41                    | 2.11                    |
| MYH11         | myosin, heavy chain 11, smooth muscle                       | 1.73                    | 2.62                    | 1.32                    | 1.99                    |
| MYH14         | myosin, heavy chain 14, non-muscle                          | 2.06                    | 3.03                    | 1.42                    | 2.09                    |
| VCL           | vinculin                                                    | 1.67                    | 2.05                    | 1.17                    | 1.43                    |
| ARF3          | ADP-ribosylation factor 3                                   | 2.87                    | 3.65                    | 1.51                    | 1.92                    |
| CAPN2         | calpain 2, (m/II) large subunit                             | 1.37                    | 1.93                    | 1.83                    | 2.58                    |
| CAPNS1        | calpain, small subunit 1                                    | 1.51                    | 2.07                    | 1.36                    | 1.86                    |
| CTTN          | cortactin                                                   | 1.71                    | 3.57                    | 1.00                    | 2.08                    |
| ITGB3         | integrin, beta 3 (platelet glycoprotein IIIa, antigen CD61) | 1.46                    | 3.13                    | -1.57                   | 1.36                    |
| TLN1          | talin 1                                                     | 1.54                    | 2.28                    | 1.02                    | 1.52                    |
| TLN2          | talin 2                                                     | 1.44                    | 2.61                    | -1.02                   | 1.78                    |
| ZYX           | zyxin                                                       | 1.38                    | 2.34                    | -1.42                   | 1.19                    |
| ARHGDIA       | Rho GDP dissociation inhibitor (GDI) alpha                  | 1.83                    | 2.52                    | 1.24                    | 1.71                    |
| FLNA          | filamin A, alpha                                            | 1.57                    | 2.04                    | 1.49                    | 1.94                    |
| FLNB          | filamin B, beta                                             | 1.97                    | 2.20                    | 1.41                    | 1.58                    |
| FLNC          | filamin C, gamma                                            | 1.47                    | 1.85                    | -1.58                   | -1.26                   |
| PPP2R1A       | protein phosphatase 2, regulatory subunit A, alpha          | 1.54                    | 1.97                    | 1.37                    | 1.76                    |
| VIM           | vimentin                                                    | 1.57                    | 2.12                    | 1.25                    | 1.69                    |

**Supplementary Table 5A: CV% (or % RSD) based on summed intensity of respective proteins**

|                           | CV% distribution             |                  |              |              |
|---------------------------|------------------------------|------------------|--------------|--------------|
|                           | Control (-) ET-1             | control (+) ET-1 | PAH (-) ET-1 | PAH (+) ET-1 |
| Average CV (%)            | 6.8                          | 8.9              | 15.3         | 4.5          |
| # proteins ≤ 20% CV       | protein counts (total: 1137) |                  |              |              |
|                           | 1125                         | 1099             | 819          | 1112         |
| Percent of total ≤ 20% CV | percent of proteins          |                  |              |              |
|                           | 98.9                         | 96.7             | 72.0         | 97.8         |

**Supplementary Table 5B: T-test calculations indicated the significance of changes from replicate analyses in group comparison.**

|                | Control (+) ET-1 vs basal | PAH (+) ET-1 vs basal | PAH vs Control both basal | PAH vs Control both (+) ET-1 |
|----------------|---------------------------|-----------------------|---------------------------|------------------------------|
| count(P<=0.05) | 926                       | 1114                  | 602                       | 1055                         |
